# Supplementary material for: Dynamic and static behavior of the H⋯π and E⋯π interactions in EH2adducts of benzene π-system (E = O, S, Se and Te), elucidated by QTAIM dual functional analysis
Source: Royal Society of Chemistry journal article supplement (doi:10.1039/c5cp06062a), 2016-01-01
Supplement: c5cp06062a1.pdf [file c5cp06062a1.pdf]

## Supplementary Information

### Dynamic and Static Behavior of the H--- $\pi$ and E--- $\pi$ Interactions in EH<sub>2</sub> Adducts of Benzene $\pi$ -System (E = O, S, Se and Te), Elucidated by QTAIM Dual Functional Analysis

Satoko Hayashi,\* Yuji Sugibayashi and Waro Nakanishi\*

Department of Material Science and Chemistry, Faculty of Systems Engineering, Wakayama University,  
930 Sakaedani, Wakayama, 640-8510 Japan

E-mail: hayashi3@sys.wakayama-u.ac.jp

#### QTAIM Dual Functional Analysis (QTAIM-DFA)

The bond critical point (BCP; \*) is an important concept in QTAIM. The BCP of  $(\omega, \sigma) = (3, -1)$ <sup>S1</sup> is a point along the bond path (BP) at the interatomic surface, where charge density  $\rho(\mathbf{r})$  reaches a minimum. It is denoted by  $\rho_b(\mathbf{r}_c)$ . While the chemical bonds or interactions between A and B are denoted by A–B, which correspond to BPs between A and B in QTAIM, A-\*–B emphasizes the presence of BCP (\*) in A–B.

The sign of the Laplacian  $\rho_b(\mathbf{r}_c)$  ( $\nabla^2\rho_b(\mathbf{r}_c)$ ) indicates that  $\rho_b(\mathbf{r}_c)$  is depleted or concentrated with respect to its surrounding, since  $\nabla^2\rho_b(\mathbf{r}_c)$  is the second derivative of  $\rho_b(\mathbf{r}_c)$ .  $\rho_b(\mathbf{r}_c)$  is locally depleted relative to the average distribution around  $\mathbf{r}_c$  if  $\nabla^2\rho_b(\mathbf{r}_c) > 0$ , but it is concentrated when  $\nabla^2\rho_b(\mathbf{r}_c) < 0$ . Total electron energy densities at BCPs ( $H_b(\mathbf{r}_c)$ ) must be a more appropriate measure for weak interactions on the energy basis.<sup>S1–S6</sup>  $H_b(\mathbf{r}_c)$  are the sum of kinetic energy densities ( $G_b(\mathbf{r}_c)$ ) and potential energy densities ( $V_b(\mathbf{r}_c)$ ) at BCPs, as shown in eqn (S1). Electrons at BCPs are stabilized when  $H_b(\mathbf{r}_c) < 0$ , therefore, interactions exhibit the covalent nature in this region, whereas they exhibit no covalency if  $H_b(\mathbf{r}_c) > 0$ , due to the destabilization of electrons at BCPs under the conditions.<sup>S1</sup> Eqn (S2) represents the relation between  $\nabla^2\rho_b(\mathbf{r}_c)$  and  $H_b(\mathbf{r}_c)$ , together with  $G_b(\mathbf{r}_c)$  and  $V_b(\mathbf{r}_c)$ , which is closely related to the virial theorem.

$$H_b(\mathbf{r}_c) = G_b(\mathbf{r}_c) + V_b(\mathbf{r}_c) \quad (\text{S1})$$

$$(\hbar^2/8m)\nabla^2\rho_b(\mathbf{r}_c) = H_b(\mathbf{r}_c) - V_b(\mathbf{r}_c)/2 \quad (\text{S2})$$

$$= G_b(\mathbf{r}_c) + V_b(\mathbf{r}_c)/2 \quad (\text{S2}')$$

Interactions are classified by the signs of  $\nabla^2\rho_b(\mathbf{r}_c)$  and  $H_b(\mathbf{r}_c)$ . Interactions in the region of  $\nabla^2\rho_b(\mathbf{r}_c) < 0$  are called shared-shell (SS) interactions and they are closed-shell (CS) interactions for  $\nabla^2\rho_b(\mathbf{r}_c) > 0$ .  $H_b(\mathbf{r}_c)$  must be negative when  $\nabla^2\rho_b(\mathbf{r}_c) < 0$ , since  $H_b(\mathbf{r}_c)$  are larger than  $(\hbar^2/8m)\nabla^2\rho_b(\mathbf{r}_c)$  by  $V_b(\mathbf{r}_c)/2$  with negative  $V_b(\mathbf{r}_c)$  at all BCPs (eqn (S2)). Consequently,  $\nabla^2\rho_b(\mathbf{r}_c) < 0$  and  $H_b(\mathbf{r}_c) < 0$  for the SS interactions. The CS interactions are especially called *pure* CS interactions for  $H_b(\mathbf{r}_c) > 0$  and  $\nabla^2\rho_b(\mathbf{r}_c) > 0$ , since electrons at BCPs are depleted and destabilized under the conditions.<sup>S1a</sup> Electrons in the intermediate region between SS and *pure* CS, which belong to CS, are locally depleted but stabilized at BCPs, since  $\nabla^2\rho_b(\mathbf{r}_c) > 0$  but  $H_b(\mathbf{r}_c) < 0$ .<sup>S1a</sup> We call the interactions in this region *regular* CS,<sup>S4,S5</sup> when it is necessary to distinguish

from *pure* CS. The role of  $\nabla^2\rho_b(\mathbf{r}_c)$  in the classification can be replaced by  $H_b(\mathbf{r}_c) - V_b(\mathbf{r}_c)/2$ , since  $(\hbar^2/8m)\nabla^2\rho_b(\mathbf{r}_c) = H_b(\mathbf{r}_c) - V_b(\mathbf{r}_c)/2$  (eqn (S2)).

We proposed QTAIM-DFA by plotting  $H_b(\mathbf{r}_c)$  versus  $H_b(\mathbf{r}_c) - V_b(\mathbf{r}_c)/2 (= (\hbar^2/8m)\nabla^2\rho_b(\mathbf{r}_c))$ ,<sup>S4a</sup> after the proposal of  $H_b(\mathbf{r}_c)$  versus  $\nabla^2\rho_b(\mathbf{r}_c)$ .<sup>S4b</sup> Both axes in the plot of the former are given in energy unit, therefore, distances on the  $(x, y) (= (H_b(\mathbf{r}_c) - V_b(\mathbf{r}_c)/2, H_b(\mathbf{r}_c)))$  plane can be expressed in the energy unit, which provides an analytical development. QTAIM-DFA can incorporate the classification of interactions by the signs of  $\nabla^2\rho_b(\mathbf{r}_c)$  and  $H_b(\mathbf{r}_c)$ . Scheme S1 summarizes the QTAIM-DFA treatment. Interactions of *pure* CS appear in the first quadrant, those of *regular* CS in the fourth quadrant and SS interactions do in the third quadrant. No interactions appear in the second one.

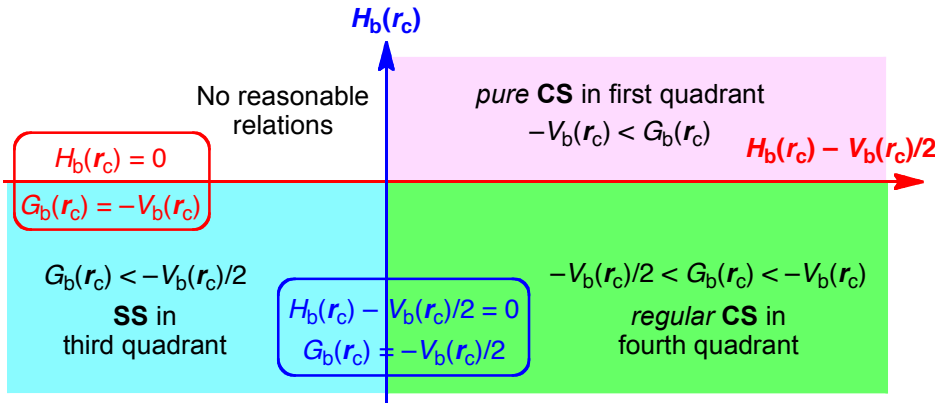

**Scheme S1.** QTAIM-DFA: Plot of  $H_b(\mathbf{r}_c)$  versus  $H_b(\mathbf{r}_c) - V_b(\mathbf{r}_c)/2$  for Weak to Strong Interactions

In our treatment, data for perturbed structures around fully optimized structures are also employed for the plots, together with the fully optimized ones (see Figure S1).<sup>S4-S6</sup> We proposed the concept of the "dynamic nature of interaction" originated from the perturbed structures. The behavior of interactions at the fully optimized structures corresponds to "the static nature of interactions", whereas that containing perturbed structures exhibit the "dynamic nature of interaction" as explained below. The method to generate the perturbed structures is discussed later. Plots of  $H_b(\mathbf{r}_c)$  versus  $H_b(\mathbf{r}_c) - V_b(\mathbf{r}_c)/2$  are analyzed employing the polar coordinate  $(R, \theta)$  representation with  $(\theta_p, \kappa_p)$  parameters.<sup>S4a,S5,S6</sup> Figure S1 explains the treatment.  $R$  in  $(R, \theta)$  is defined by eqn (S3) and given in the energy unit.  $R$  corresponds to the energy for an interaction at BCP. The plots show a spiral stream, as a whole.  $\theta$  in  $(R, \theta)$  defined by eqn (S4), measured from the y-axis, controls the spiral stream of the plot. Each plot for an interaction shows a specific curve, which provides important information of the interaction (see Figure S1). The curve is expressed by  $\theta_p$  and  $\kappa_p$ . While  $\theta_p$ , defined by eqn (S5) and measured from the y-direction, corresponds to the tangent line of a plot, where  $\theta_p$  is calculated employing data of the perturbed structures with a fully-optimized structure and  $\kappa_p$  is the curvature of the plot (eqn (S6)). While  $(R, \theta)$  correspond to the static nature,  $(\theta_p, \kappa_p)$  represent the dynamic nature of interactions. We call  $(R, \theta)$  and  $(\theta_p, \kappa_p)$  QTAIM-DFA parameters, whereas  $\rho_b(\mathbf{r}_c)$ ,  $\nabla^2\rho_b(\mathbf{r}_c)$ ,  $G_b(\mathbf{r}_c)$ ,  $V_b(\mathbf{r}_c)$ ,  $H_b(\mathbf{r}_c)$  and  $H_b(\mathbf{r}_c) - V_b(\mathbf{r}_c)/2$  belong to QTAIM functions.  $k_b(\mathbf{r}_c)$ , defined by eqn (S7), is an QTAIM function but it will be treated as if it were an QTAIM-DFA parameter, if suitable.

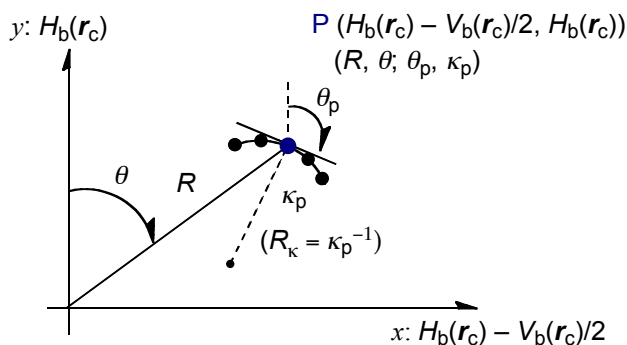

**Figure S1.** Polar  $(R, \theta)$  coordinate representation of  $H_b(\mathbf{r}_c)$  versus  $H_b(\mathbf{r}_c) - V_b(\mathbf{r}_c)/2$ , with  $(\theta_p, \kappa_p)$  parameters.

$$R = (x^2 + y^2)^{1/2} \quad (\text{S3})$$

$$\theta = 90^\circ - \tan^{-1}(y/x) \quad (\text{S4})$$

$$\theta_p = 90^\circ - \tan^{-1}(dy/dx) \quad (\text{S5})$$

$$\kappa_p = |d^2y/dx^2|/[1 + (dy/dx)^2]^{3/2} \quad (\text{S6})$$

$$k_b(\mathbf{r}_c) = V_b(\mathbf{r}_c)/G_b(\mathbf{r}_c) \quad (\text{S7})$$

where  $(x, y) = (H_b(\mathbf{r}_c) - V_b(\mathbf{r}_c)/2, H_b(\mathbf{r}_c))$

### Criteria for Classification of Interactions: Behavior of Typical Interactions Elucidated by QTAIM-DFA

$H_b(\mathbf{r}_c)$  are plotted versus  $H_b(\mathbf{r}_c) - V_b(\mathbf{r}_c)/2$  for typical interactions in vdW (van der Waals interactions), HB (hydrogen bonds), CT-MC (molecular complexes through charge transfer),  $X_3^-$  (trihalide ions), CT-TBP (trigonal bipyramidal adducts through charge-transfer), Cov-w (weak covalent bonds) and Cov-s (strong covalent bonds).<sup>S4,S6</sup> Rough criteria are obtained, after the analysis of the plots for the typical interactions according to eqns (S3)–(S7), by applying QTAIM-DFA. Scheme S2 shows the rough criteria, which are accomplished by the  $\theta$  and  $\theta_p$  values, together with the values of  $k_b(\mathbf{r}_c)$ . The criteria will be employed to discuss the nature of interactions in question, as a reference.

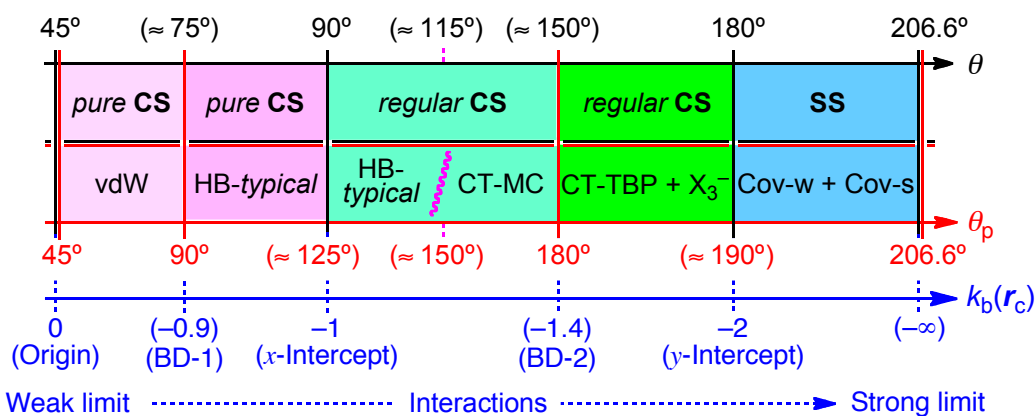

**Scheme S2.** Rough classification of interactions by  $\theta$  and  $\theta_p$ , together with  $k_b(\mathbf{r}_c) (= V_b(\mathbf{r}_c)/G_b(\mathbf{r}_c))$ .

**Table S1** Energies for the formation of the the EH<sub>2</sub> adducts with benzene  $\pi$ -system on the energy surface, together with the lowest two frequencies, optimized at the MP2, M06-2X and M06 levels with BSS-F<sup>a</sup>

| Species (X---Y)<br>(symmetry: type)                                                                                  | $E_{ES}^b$<br>(au) | $\nu_1$<br>(cm <sup>-1</sup> ) | $\nu_2$<br>(cm <sup>-1</sup> ) |
|----------------------------------------------------------------------------------------------------------------------|--------------------|--------------------------------|--------------------------------|
| <b>MP2 level</b>                                                                                                     |                    |                                |                                |
| HO-H--- $\pi$ (C <sub>6</sub> H <sub>6</sub> ) (C <sub>s</sub> : type Ia <sub>Bzn</sub> )                            | -307.906387        | 11.6 (A'')                     | 50.7 (A')                      |
| HS-H--- $\pi$ (C <sub>6</sub> H <sub>6</sub> ) (C <sub>s</sub> : type Ib <sub>Bzn</sub> )                            | -630.482146        | 17.6 (A'')                     | 21.6 (A')                      |
| HSe-H--- $\pi$ (C <sub>6</sub> H <sub>6</sub> ) (C <sub>s</sub> : type Ib <sub>Bzn</sub> )                           | -2632.888073       | 21.0 (A'')                     | 37.5 (A')                      |
| HTe-H--- $\pi$ (C <sub>6</sub> H <sub>6</sub> ) (C <sub>s</sub> : type Ib <sub>Bzn</sub> )                           | -6844.626737       | 22.4 (A'')                     | 65.5 (A')                      |
| OH <sub>2</sub> --- $\pi$ (C <sub>6</sub> H <sub>6</sub> ) (C <sub>2</sub> : type II <sub>Bzn</sub> ) <sup>c</sup>   | -307.905756        | -147.5 (B)                     | 21.0 (A)                       |
| SH <sub>2</sub> --- $\pi$ (C <sub>6</sub> H <sub>6</sub> ) (C <sub>2</sub> : type II <sub>Bzn</sub> ) <sup>c</sup>   | -630.481572        | -110.4 (B)                     | 33.9 (A)                       |
| SeH <sub>2</sub> --- $\pi$ (C <sub>6</sub> H <sub>6</sub> ) (C <sub>2</sub> : type II <sub>Bzn</sub> ) <sup>c</sup>  | -2632.887136       | -116.1 (B)                     | 40.9 (A)                       |
| TeH <sub>2</sub> --- $\pi$ (C <sub>6</sub> H <sub>6</sub> ) (C <sub>2</sub> : type II <sub>Bzn</sub> ) <sup>c</sup>  | -6844.624269       | -89.4 (B)                      | 14.5 (A)                       |
| SH <sub>2</sub> --- $\pi$ (C <sub>6</sub> H <sub>6</sub> ) (C <sub>2</sub> : type II' <sub>Bzn</sub> ) <sup>d</sup>  | -630.481554        | -112.2 (B)                     | -37.2 (A)                      |
| TeH <sub>2</sub> --- $\pi$ (C <sub>6</sub> H <sub>6</sub> ) (C <sub>2</sub> : type II' <sub>Bzn</sub> ) <sup>d</sup> | -6844.624252       | -96.5 (B)                      | -39.9 (A)                      |
| <b>M06-2X level</b>                                                                                                  |                    |                                |                                |
| HO-H--- $\pi$ (C <sub>6</sub> H <sub>6</sub> ) (C <sub>s</sub> : type Ia <sub>Bzn</sub> )                            | -308.630010        | 66.5 (A'')                     | 74.4 (A')                      |
| HS-H--- $\pi$ (C <sub>6</sub> H <sub>6</sub> ) (C <sub>s</sub> : type Ia <sub>Bzn</sub> )                            | -631.586268        | 62.3 (A'')                     | 70.0 (A')                      |
| HSe-H--- $\pi$ (C <sub>6</sub> H <sub>6</sub> ) (C <sub>1</sub> : type Ia <sub>Bzn</sub> )                           | -2634.946918       | 61.1 (A)                       | 63.0 (A)                       |
| HTe-H--- $\pi$ (C <sub>6</sub> H <sub>6</sub> ) (C <sub>s</sub> : type Ia <sub>Bzn</sub> )                           | -6848.034500       | 62.0 (A')                      | 64.4 (A'')                     |
| HS-H--- $\pi$ (C <sub>6</sub> H <sub>6</sub> ) (C <sub>s</sub> : type Ib <sub>Bzn</sub> ) <sup>c</sup>               | -631.586194        | -135.5 (A'')                   | 66.9 (A')                      |
| HSe-H--- $\pi$ (C <sub>6</sub> H <sub>6</sub> ) (C <sub>s</sub> : type Ib <sub>Bzn</sub> )                           | -2634.947299       | 62.0 (A')                      | 62.5 (A'')                     |
| HTe-H--- $\pi$ (C <sub>6</sub> H <sub>6</sub> ) (C <sub>s</sub> : type Ib <sub>Bzn</sub> )                           | -6848.036017       | 62.2 (A'')                     | 64.6 (A')                      |
| OH <sub>2</sub> --- $\pi$ (C <sub>6</sub> H <sub>6</sub> ) (C <sub>2</sub> : type II <sub>Bzn</sub> )                | -308.630031        | 65.1 (B)                       | 72.4 (B)                       |
| SH <sub>2</sub> --- $\pi$ (C <sub>6</sub> H <sub>6</sub> ) (C <sub>2</sub> : type II' <sub>Bzn</sub> )               | -631.586072        | 56.2 (B)                       | 62.5 (B)                       |
| SeH <sub>2</sub> --- $\pi$ (C <sub>6</sub> H <sub>6</sub> ) (C <sub>2</sub> : type II <sub>Bzn</sub> )               | -2634.946631       | 28.1 (B)                       | 61.1 (B)                       |
| TeH <sub>2</sub> --- $\pi$ (C <sub>6</sub> H <sub>6</sub> ) (C <sub>2</sub> : type II <sub>Bzn</sub> )               | -6848.033902       | 36.8 (B)                       | 55.5 (B)                       |
| <b>M06 level</b>                                                                                                     |                    |                                |                                |
| HO-H--- $\pi$ (C <sub>6</sub> H <sub>6</sub> ) (C <sub>s</sub> : type Ia <sub>Bzn</sub> )                            | -308.539690        | 34.7 (A'')                     | 53.7 (A')                      |
| HS-H--- $\pi$ (C <sub>6</sub> H <sub>6</sub> ) (C <sub>s</sub> : type Ia <sub>Bzn</sub> )                            | -631.502600        | 29.3 (A'')                     | 67.4 (A')                      |
| HSe-H--- $\pi$ (C <sub>6</sub> H <sub>6</sub> ) (C <sub>s</sub> : type Ia <sub>Bzn</sub> )                           | -2634.74530        | 31.6 (A'')                     | 52.1 (A')                      |
| HTe-H--- $\pi$ (C <sub>6</sub> H <sub>6</sub> ) (C <sub>s</sub> : type Ia <sub>Bzn</sub> )                           | -6847.371069       | 30.9 (A'')                     | 45.0 (A')                      |
| HS-H--- $\pi$ (C <sub>6</sub> H <sub>6</sub> ) (C <sub>s</sub> : type Ib <sub>Bzn</sub> )                            | -631.502162        | 45.0 (A'')                     | 57.9 (A')                      |
| HSe-H--- $\pi$ (C <sub>6</sub> H <sub>6</sub> ) (C <sub>s</sub> : type Ib <sub>Bzn</sub> )                           | -2634.745559       | 27.9 (A'')                     | 63.7 (A')                      |
| HTe-H--- $\pi$ (C <sub>6</sub> H <sub>6</sub> ) (C <sub>s</sub> : type Ib <sub>Bzn</sub> )                           | -6847.372391       | 41.1 (A'')                     | 54.5 (A')                      |
| OH <sub>2</sub> --- $\pi$ (C <sub>6</sub> H <sub>6</sub> ) (C <sub>2</sub> : type II <sub>Bzn</sub> )                | -308.539667        | 47.6 (B)                       | 53.2 (B)                       |
| SH <sub>2</sub> --- $\pi$ (C <sub>6</sub> H <sub>6</sub> ) (C <sub>1</sub> : type II <sub>Bzn</sub> )                | -631.502589        | 38.9 (A)                       | 46.0 (A)                       |
| SeH <sub>2</sub> --- $\pi$ (C <sub>6</sub> H <sub>6</sub> ) (C <sub>2</sub> : type II' <sub>Bzn</sub> )              | -2634.745336       | 41.5 (B)                       | 49.9 (B)                       |
| TeH <sub>2</sub> --- $\pi$ (C <sub>6</sub> H <sub>6</sub> ) (C <sub>2</sub> : type II <sub>Bzn</sub> )               | -6847.371104       | 41.0 (B)                       | 50.4 (B)                       |

<sup>a</sup> See text for BSS-F. <sup>b</sup> On the energy surface. <sup>c</sup> One imaginary frequency being predicted for each.

<sup>d</sup> Two imaginary frequencies being predicted for each.

**Table S2** Structural parameters for the EH<sub>2</sub> adducts with benzene  $\pi$ -system, optimized by applying the counterpoise correction method at the MP2, M06-2X and M06 levels with BSS-F<sup>a,b</sup>

| Species (X---Y)<br>(symmetry: type)                                                                     | $r_1$<br>(Å) | $r_2$<br>(Å) | $r_3$<br>(Å) | $\theta_1$<br>(°) | $\theta_2$<br>(°) | $\theta_3$<br>(°) | $\phi_1$<br>(°) | $\phi_2$<br>(°) |
|---------------------------------------------------------------------------------------------------------|--------------|--------------|--------------|-------------------|-------------------|-------------------|-----------------|-----------------|
| <b>MP2 level (Counterpoise)</b>                                                                         |              |              |              |                   |                   |                   |                 |                 |
| HO-H--- $\pi$ (C <sub>6</sub> H <sub>6</sub> ) (C <sub>s</sub> : type Ia <sub>Bzn</sub> )               | 2.9282       | 0.9633       | 0.9606       | 77.5              | 155.2             | 104.2             | -82.6           | -149.2          |
| HS-H--- $\pi$ (C <sub>6</sub> H <sub>6</sub> ) (C <sub>s</sub> : type Ib <sub>Bzn</sub> )               | 2.6311       | 1.3387       | 1.3373       | 85.0              | 137.4             | 92.9              | -87.1           | -149.9          |
| HSe-H--- $\pi$ (C <sub>6</sub> H <sub>6</sub> ) (C <sub>s</sub> : type Ib <sub>Bzn</sub> )              | 2.6981       | 1.4586       | 1.4584       | 83.9              | 125.7             | 92.0              | -86.4           | -149.8          |
| HTe-H--- $\pi$ (C <sub>6</sub> H <sub>6</sub> ) (C <sub>s</sub> : type Ib <sub>Bzn</sub> )              | 2.8190       | 1.6563       | 1.6583       | 83.2              | 114.3             | 91.3              | -94.0           | -149.7          |
| OH <sub>2</sub> --- $\pi$ (C <sub>6</sub> H <sub>6</sub> ) (C <sub>2</sub> : type II <sub>Bzn</sub> )   | 3.4452       | 0.9619       | 0.9619       | 90.0              | 51.7              | 103.3             | 90.0            | -30.0           |
| SH <sub>2</sub> --- $\pi$ (C <sub>6</sub> H <sub>6</sub> ) (C <sub>2</sub> : type II <sub>Bzn</sub> )   | 3.8381       | 1.3381       | 1.3381       | 90.0              | 45.8              | 91.6              | 90.0            | -30.0           |
| SeH <sub>2</sub> --- $\pi$ (C <sub>6</sub> H <sub>6</sub> ) (C <sub>2</sub> : type II <sub>Bzn</sub> )  | 3.9427       | 1.4584       | 1.4584       | 90.0              | 45.3              | 90.6              | 90.0            | -30.0           |
| TeH <sub>2</sub> --- $\pi$ (C <sub>6</sub> H <sub>6</sub> ) (C <sub>2</sub> : type II <sub>Bzn</sub> )  | 4.1281       | 1.6563       | 1.6563       | 90.0              | 45.2              | 90.4              | 90.0            | -30.0           |
| SH <sub>2</sub> --- $\pi$ (C <sub>6</sub> H <sub>6</sub> ) (C <sub>2</sub> : type II' <sub>Bzn</sub> )  | 3.8378       | 1.3381       | 1.3381       | 90.0              | 45.8              | 91.6              | 90.0            | 0.0             |
| TeH <sub>2</sub> --- $\pi$ (C <sub>6</sub> H <sub>6</sub> ) (C <sub>2</sub> : type II' <sub>Bzn</sub> ) | 4.1290       | 1.6563       | 1.6563       | 90.0              | 45.2              | 90.4              | 90.0            | 0.0             |
| <b>M06-2X level (Counterpoise)</b>                                                                      |              |              |              |                   |                   |                   |                 |                 |
| HO-H--- $\pi$ (C <sub>6</sub> H <sub>6</sub> ) (C <sub>s</sub> : type Ia <sub>Bzn</sub> )               | 2.5731       | 0.9618       | 0.9600       | 78.9              | 126.4             | 103.7             | -83.5           | -149.3          |
|                                                                                                         | 2.9450       | 0.9600       | 0.9618       | 74.5              | 99.0              | 103.7             | -80.8           | -148.7          |
| HS-H--- $\pi$ (C <sub>6</sub> H <sub>6</sub> ) (C <sub>s</sub> : type Ia <sub>Bzn</sub> )               | 2.5579       | 1.3400       | 1.3367       | 84.6              | 145.6             | 92.0              | -86.9           | -149.8          |
| HSe-H--- $\pi$ (C <sub>6</sub> H <sub>6</sub> ) (C <sub>s</sub> : type Ia <sub>Bzn</sub> )              | 2.5760       | 1.4685       | 1.4665       | 84.7              | 144.3             | 91.0              | -86.9           | -149.8          |
| HTe-H--- $\pi$ (C <sub>6</sub> H <sub>6</sub> ) (C <sub>s</sub> : type Ia <sub>Bzn</sub> )              | 2.6410       | 1.6682       | 1.6667       | 84.7              | 138.2             | 91.6              | -86.9           | -149.8          |
| HS-H--- $\pi$ (C <sub>6</sub> H <sub>6</sub> ) (C <sub>s</sub> : type Ib <sub>Bzn</sub> )               | 2.5542       | 1.3387       | 1.3383       | 86.6              | 129.4             | 92.9              | -88.0           | -149.9          |
| HSe-H--- $\pi$ (C <sub>6</sub> H <sub>6</sub> ) (C <sub>s</sub> : type Ib <sub>Bzn</sub> )              | 2.5681       | 1.4683       | 1.4673       | 85.6              | 128.1             | 91.8              | -87.5           | -149.9          |
| HTe-H--- $\pi$ (C <sub>6</sub> H <sub>6</sub> ) (C <sub>s</sub> : type Ib <sub>Bzn</sub> )              | 2.6954       | 1.6672       | 1.6690       | 84.5              | 117.0             | 91.9              | -86.8           | -149.8          |
| OH <sub>2</sub> --- $\pi$ (C <sub>6</sub> H <sub>6</sub> ) (C <sub>2</sub> : type II <sub>Bzn</sub> )   | 3.2349       | 0.9609       | 0.9609       | 90.0              | 51.8              | 103.6             | 90.0            | -24.6           |
| SH <sub>2</sub> --- $\pi$ (C <sub>6</sub> H <sub>6</sub> ) (C <sub>2</sub> : type II' <sub>Bzn</sub> )  | 3.7224       | 1.3380       | 1.3380       | 90.1              | 45.8              | 91.5              | 89.9            | 7.5             |
| SeH <sub>2</sub> --- $\pi$ (C <sub>6</sub> H <sub>6</sub> ) (C <sub>2</sub> : type II <sub>Bzn</sub> )  | 3.8374       | 1.4679       | 1.4679       | 90.0              | 45.3              | 90.6              | -90.0           | 30.0            |
| TeH <sub>2</sub> --- $\pi$ (C <sub>6</sub> H <sub>6</sub> ) (C <sub>2</sub> : type II <sub>Bzn</sub> )  | 4.0472       | 1.6671       | 1.6671       | 90.1              | 45.6              | 91.2              | 90.0            | -19.8           |
| <b>M06 level (Counterpoise)</b>                                                                         |              |              |              |                   |                   |                   |                 |                 |
| HO-H--- $\pi$ (C <sub>6</sub> H <sub>6</sub> ) (C <sub>s</sub> : type Ia <sub>Bzn</sub> )               | 2.7425       | 0.9612       | 0.9595       | 75.5              | 124.5             | 103.9             | -81.4           | -148.9          |
| HS-H--- $\pi$ (C <sub>6</sub> H <sub>6</sub> ) (C <sub>s</sub> : type Ia <sub>Bzn</sub> )               | 2.6601       | 1.3468       | 1.3429       | 78.5              | 146.6             | 91.8              | -83.2           | -149.3          |
| HSe-H--- $\pi$ (C <sub>6</sub> H <sub>6</sub> ) (C <sub>s</sub> : type Ia <sub>Bzn</sub> )              | 2.6629       | 1.4735       | 1.4705       | 80.5              | 143.4             | 91.2              | -84.4           | -149.5          |
| HTe-H--- $\pi$ (C <sub>6</sub> H <sub>6</sub> ) (C <sub>s</sub> : type Ia <sub>Bzn</sub> )              | 2.7857       | 1.6746       | 1.6721       | 79.5              | 132.8             | 91.0              | -83.8           | -149.4          |
| HS-H--- $\pi$ (C <sub>6</sub> H <sub>6</sub> ) (C <sub>s</sub> : type Ib <sub>Bzn</sub> )               | 2.7024       | 1.3455       | 1.3433       | 85.2              | 125.8             | 92.5              | -87.2           | -149.9          |
| HSe-H--- $\pi$ (C <sub>6</sub> H <sub>6</sub> ) (C <sub>s</sub> : type Ib <sub>Bzn</sub> )              | 2.7083       | 1.4718       | 1.4713       | 85.1              | 122.6             | 92.0              | -87.1           | -149.8          |
| HTe-H--- $\pi$ (C <sub>6</sub> H <sub>6</sub> ) (C <sub>s</sub> : type Ib <sub>Bzn</sub> )              | 2.8841       | 1.6731       | 1.6754       | 84.6              | 111.9             | 91.2              | -86.9           | -149.8          |
| OH <sub>2</sub> --- $\pi$ (C <sub>6</sub> H <sub>6</sub> ) (C <sub>2</sub> : type II <sub>Bzn</sub> )   | 3.3870       | 0.9602       | 0.9602       | 90.0              | 52.0              | 103.9             | 90.0            | -27.9           |
| SH <sub>2</sub> --- $\pi$ (C <sub>6</sub> H <sub>6</sub> ) (C <sub>2</sub> : type II <sub>Bzn</sub> )   | 3.7765       | 1.3455       | 1.3455       | 90.0              | 45.7              | 91.3              | -90.0           | 20.7            |
| SeH <sub>2</sub> --- $\pi$ (C <sub>6</sub> H <sub>6</sub> ) (C <sub>1</sub> : type II' <sub>Bzn</sub> ) | 3.8872       | 1.4724       | 1.4724       | 90.0              | 45.4              | 90.8              | 90.0            | 0.0             |
| TeH <sub>2</sub> --- $\pi$ (C <sub>6</sub> H <sub>6</sub> ) (C <sub>2</sub> : type II <sub>Bzn</sub> )  | 4.1557       | 1.6728       | 1.6728       | 90.0              | 45.4              | 90.7              | 90.0            | -11.7           |

<sup>a</sup> See text for BSS-F. <sup>b</sup> See Chart S1 and Scheme S3 for the structural parameters, which are the same as Chart 1 and Scheme 1, respectively.

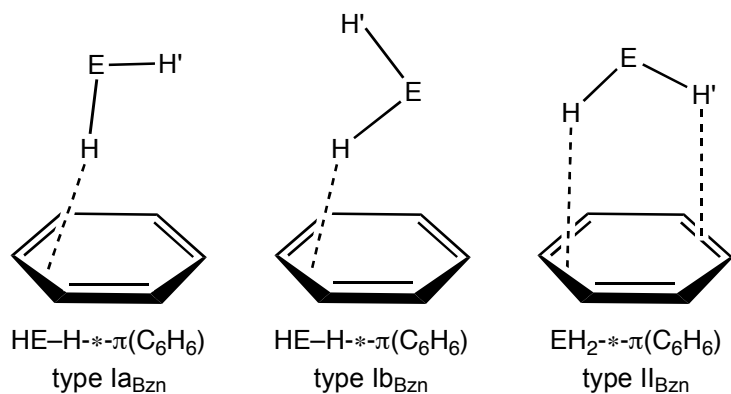

E = O, S, Se and Te

(EH<sub>2</sub>) $\cdots\pi(\text{C}_6\text{H}_6)$ : type Ia<sub>Bzn</sub> + type Ib<sub>Bzn</sub> + type II<sub>Bzn</sub>

**Chart S1.** Structures expected for (EH<sub>2</sub>) $\cdots\pi(\text{C}_6\text{H}_6)$  (E = O, S, Se and Te).

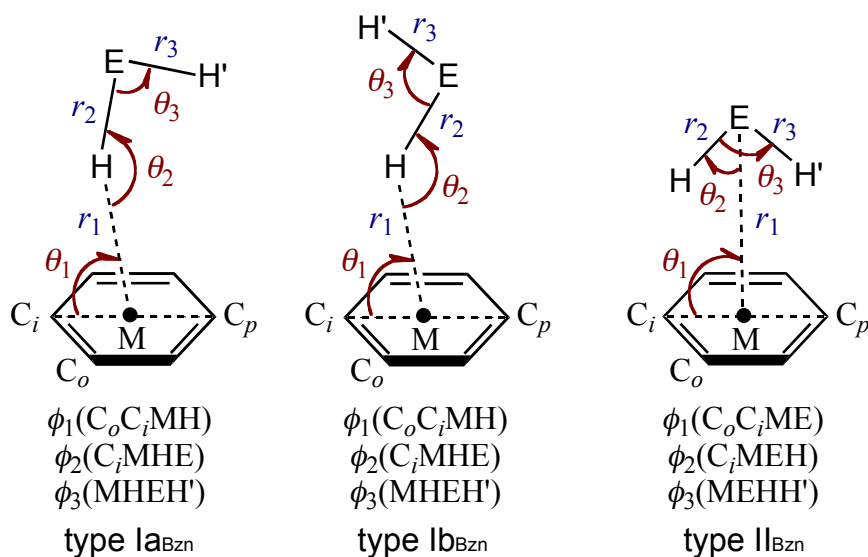

**Scheme S3** Structural Parameters for (EH<sub>2</sub>) $\cdots\pi(\text{C}_6\text{H}_6)$ . The C<sub>i</sub> atom in C<sub>6</sub>H<sub>6</sub> is selected so as to the  $r(\text{C}_i\cdots\text{H})$  distance being shortest.

**Table S3** The  $E_{CP}$ ,  $E_{BSSE}$ ,  $\Delta E_{raw}$ , and  $\Delta E_{BSSE}$  values for the  $\text{EH}_2$  adducts with benzene  $\pi$ -system, evaluated by applying the counterpoise correction method at the MP2, M06-2X and M06 levels with BSS-F.<sup>a</sup>

| Species (X---Y)<br>(symmetry: type)                                                  | $E_{CP}^b$<br>(au) | $E_{BSSE}^c$<br>(au) | $\Delta E_{raw}^d$<br>(kJ mol <sup>-1</sup> ) | $\Delta E_{BSSE}^e$<br>(kJ mol <sup>-1</sup> ) |
|--------------------------------------------------------------------------------------|--------------------|----------------------|-----------------------------------------------|------------------------------------------------|
| <b>MP2 level (Counterpoise)</b>                                                      |                    |                      |                                               |                                                |
| HO-H--- $\pi(\text{C}_6\text{H}_6)$ ( $C_s$ : type Ia <sub>Bzn</sub> )               | -307.903572        | 0.002458             | -17.7                                         | -11.2                                          |
| HS-H--- $\pi(\text{C}_6\text{H}_6)$ ( $C_s$ : type Ib <sub>Bzn</sub> )               | -630.479311        | 0.002629             | -18.5                                         | -11.5                                          |
| HSe-H--- $\pi(\text{C}_6\text{H}_6)$ ( $C_s$ : type Ib <sub>Bzn</sub> )              | -2632.884989       | 0.002884             | -20.0                                         | -12.5                                          |
| HTe-H--- $\pi(\text{C}_6\text{H}_6)$ ( $C_s$ : type Ib <sub>Bzn</sub> )              | -6844.621699       | 0.004591             | -26.9                                         | -14.8                                          |
| OH <sub>2</sub> --- $\pi(\text{C}_6\text{H}_6)$ ( $C_2$ : type II <sub>Bzn</sub> )   | -307.903467        | 0.002166             | -16.8                                         | -11.1                                          |
| SH <sub>2</sub> --- $\pi(\text{C}_6\text{H}_6)$ ( $C_2$ : type II <sub>Bzn</sub> )   | -630.479133        | 0.002329             | -17.2                                         | -11.1                                          |
| SeH <sub>2</sub> --- $\pi(\text{C}_6\text{H}_6)$ ( $C_2$ : type II <sub>Bzn</sub> )  | -2632.884507       | 0.002490             | -17.7                                         | -11.2                                          |
| TeH <sub>2</sub> --- $\pi(\text{C}_6\text{H}_6)$ ( $C_2$ : type II <sub>Bzn</sub> )  | -6844.620363       | 0.003643             | -20.9                                         | -11.3                                          |
| SH <sub>2</sub> --- $\pi(\text{C}_6\text{H}_6)$ ( $C_2$ : type II' <sub>Bzn</sub> )  | -630.479136        | 0.002313             | -17.2                                         | -11.1                                          |
| TeH <sub>2</sub> --- $\pi(\text{C}_6\text{H}_6)$ ( $C_2$ : type II' <sub>Bzn</sub> ) | -6844.620358       | 0.003644             | -20.9                                         | -11.3                                          |
| <b>M06-2X level (Counterpoise)</b>                                                   |                    |                      |                                               |                                                |
| HO-H--- $\pi(\text{C}_6\text{H}_6)$ ( $C_s$ : type Ia <sub>Bzn</sub> )               | -308.629250        | 0.000754             | -17.9                                         | -15.9                                          |
| HS-H--- $\pi(\text{C}_6\text{H}_6)$ ( $C_s$ : type Ia <sub>Bzn</sub> )               | -631.585739        | 0.000524             | -14.8                                         | -13.4                                          |
| HSe-H--- $\pi(\text{C}_6\text{H}_6)$ ( $C_s$ : type Ia <sub>Bzn</sub> )              | -2634.946344       | 0.000512             | -14.6                                         | -13.2                                          |
| HTe-H--- $\pi(\text{C}_6\text{H}_6)$ ( $C_s$ : type Ia <sub>Bzn</sub> )              | -6848.034012       | 0.000485             | -13.5                                         | -12.2                                          |
| HS-H--- $\pi(\text{C}_6\text{H}_6)$ ( $C_s$ : type Ib <sub>Bzn</sub> )               | -631.585619        | 0.000565             | -14.7                                         | -13.2                                          |
| HSe-H--- $\pi(\text{C}_6\text{H}_6)$ ( $C_s$ : type Ib <sub>Bzn</sub> )              | -2634.946762       | 0.000534             | -15.6                                         | -14.2                                          |
| HTe-H--- $\pi(\text{C}_6\text{H}_6)$ ( $C_s$ : type Ib <sub>Bzn</sub> )              | -6848.035387       | 0.000624             | -17.5                                         | -15.9                                          |
| OH <sub>2</sub> --- $\pi(\text{C}_6\text{H}_6)$ ( $C_2$ : type II <sub>Bzn</sub> )   | -308.629249        | 0.000774             | -18.0                                         | -15.9                                          |
| SH <sub>2</sub> --- $\pi(\text{C}_6\text{H}_6)$ ( $C_2$ : type II' <sub>Bzn</sub> )  | -631.585394        | 0.000528             | -14.3                                         | -12.9                                          |
| SeH <sub>2</sub> --- $\pi(\text{C}_6\text{H}_6)$ ( $C_2$ : type II <sub>Bzn</sub> )  | -2634.94612        | 0.000502             | -13.8                                         | -12.5                                          |
| TeH <sub>2</sub> --- $\pi(\text{C}_6\text{H}_6)$ ( $C_2$ : type II <sub>Bzn</sub> )  | -6848.033441       | 0.000455             | -11.9                                         | -10.7                                          |
| <b>M06 level (Counterpoise)</b>                                                      |                    |                      |                                               |                                                |
| HO-H--- $\pi(\text{C}_6\text{H}_6)$ ( $C_s$ : type Ia <sub>Bzn</sub> )               | -308.538894        | 0.000789             | -13.8                                         | -11.8                                          |
| HS-H--- $\pi(\text{C}_6\text{H}_6)$ ( $C_s$ : type Ia <sub>Bzn</sub> )               | -631.501951        | 0.000638             | -12.3                                         | -10.7                                          |
| HSe-H--- $\pi(\text{C}_6\text{H}_6)$ ( $C_s$ : type Ia <sub>Bzn</sub> )              | -2634.744695       | 0.000600             | -12.3                                         | -10.8                                          |
| HTe-H--- $\pi(\text{C}_6\text{H}_6)$ ( $C_s$ : type Ia <sub>Bzn</sub> )              | -6847.370505       | 0.000556             | -11.6                                         | -10.1                                          |
| HS-H--- $\pi(\text{C}_6\text{H}_6)$ ( $C_s$ : type Ib <sub>Bzn</sub> )               | -631.501535        | 0.000619             | -11.3                                         | -9.7                                           |
| HSe-H--- $\pi(\text{C}_6\text{H}_6)$ ( $C_s$ : type Ib <sub>Bzn</sub> )              | -2634.744927       | 0.000627             | -13.1                                         | -11.4                                          |
| HTe-H--- $\pi(\text{C}_6\text{H}_6)$ ( $C_s$ : type Ib <sub>Bzn</sub> )              | -6847.371694       | 0.000684             | -15.1                                         | -13.3                                          |
| OH <sub>2</sub> --- $\pi(\text{C}_6\text{H}_6)$ ( $C_2$ : type II <sub>Bzn</sub> )   | -308.538861        | 0.000797             | -13.8                                         | -11.7                                          |
| SH <sub>2</sub> --- $\pi(\text{C}_6\text{H}_6)$ ( $C_2$ : type II <sub>Bzn</sub> )   | -631.501977        | 0.000657             | -12.5                                         | -10.8                                          |
| SeH <sub>2</sub> --- $\pi(\text{C}_6\text{H}_6)$ ( $C_1$ : type II' <sub>Bzn</sub> ) | -2634.744773       | 0.000572             | -12.6                                         | -11.0                                          |
| TeH <sub>2</sub> --- $\pi(\text{C}_6\text{H}_6)$ ( $C_2$ : type II <sub>Bzn</sub> )  | -6847.370594       | 0.000505             | -11.6                                         | -10.3                                          |

<sup>a</sup> See text for BSS-F. <sup>b</sup> The counterpoise corrected energy. <sup>c</sup> Energy correction for basis set superposition error. <sup>d</sup> Energies for the formation of the complexes without considering  $E_{BSSE}$ . <sup>e</sup> Energies for the formation of the complexes corrected by  $E_{BSSE}$ .

**Table S4.** Lengths of Bond Paths ( $r_{BP}$ ) with Components ( $r_{BP-1}$  and  $r_{BP-2}$ ) and the Corresponding Straight-line Distances ( $R_{SL}$ ) in  $(EH_2)-*\pi(C_6H_6)$  ( $E = O, S, Se$  and  $Te$ ), Evaluated at the MP2, M06-2X and M06 Levels with BSS-F<sup>a,b</sup>

| Species (X---Y)<br>(symmetry: type)                          | $r_{BP-1}$<br>(Å) | $r_{BP-2}$<br>(Å) | $r_{BP}$<br>(Å) | $R_{SL}$<br>(Å) |
|--------------------------------------------------------------|-------------------|-------------------|-----------------|-----------------|
| <b>MP2 level</b>                                             |                   |                   |                 |                 |
| HO-H-* $\pi$ ( $C_s$ : type Ia <sub>Bzn</sub> )              | 0.9491            | 1.5640            | 2.5131          | 2.4862          |
| HS-H-* $\pi$ ( $C_s$ : type Ib <sub>Bzn</sub> )              | 1.0499            | 1.6026            | 2.6526          | 2.6356          |
| HSe-H-* $\pi$ ( $C_s$ : type Ib <sub>Bzn</sub> )             | 1.0785            | 1.6010            | 2.6795          | 2.6650          |
| HTe-H-* $\pi$ ( $C_s$ : type Ib <sub>Bzn</sub> )             | 1.1683            | 1.6294            | 2.7978          | 2.7814          |
| HHTe-* $\pi$ ( $C_s$ : type Ib <sub>Bzn</sub> )              | 1.8733            | 1.5979            | 3.4712          | 3.4705          |
| OH <sub>2</sub> -* $\pi$ ( $C_2$ : type II <sub>Bzn</sub> )  | 1.1288            | 2.3613            | 3.4901          | 2.8465          |
| SH <sub>2</sub> -* $\pi$ ( $C_2$ : type II <sub>Bzn</sub> )  | 1.1587            | 2.3530            | 3.5116          | 2.8902          |
| SeH <sub>2</sub> -* $\pi$ ( $C_2$ : type II <sub>Bzn</sub> ) | 1.1633            | 2.3377            | 3.5010          | 2.8843          |
| TeH <sub>2</sub> -* $\pi$ ( $C_2$ : type II <sub>Bzn</sub> ) | 1.1836            | 2.3173            | 3.5009          | 2.8854          |
| <b>M06-2X level</b>                                          |                   |                   |                 |                 |
| HO-H-* $\pi$ ( $C_s$ : type Ia <sub>Bzn</sub> )              | 1.0050            | 1.5988            | 2.6039          | 2.5729          |
| (weaker $\pi$ -HB                                            | 1.2693            | 1.6631            | 2.9324          | 2.7935)         |
| H <sub>2</sub> S-* $\pi$ ( $C_s$ : type Ia <sub>Bzn</sub> )  | 1.0679            | 1.6340            | 2.7019          | 2.6862          |
| H <sub>2</sub> Se-* $\pi$ ( $C_1$ : type Ia <sub>Bzn</sub> ) | 1.0808            | 1.6254            | 2.7062          | 2.6924          |
| H <sub>2</sub> Te-* $\pi$ ( $C_s$ : type Ia <sub>Bzn</sub> ) | 1.1328            | 1.6461            | 2.7789          | 2.7671          |
| HS-H-* $\pi$ ( $C_s$ : type Ib <sub>Bzn</sub> )              | 1.1002            | 1.6585            | 2.7587          | 2.7416          |
| (HHS-* $\pi$                                                 | 2.1813            | 1.6435            | 3.8247          | 3.4525)         |
| HSe-H-* $\pi$ ( $C_s$ : type Ib <sub>Bzn</sub> )             | 1.1025            | 1.6373            | 2.7398          | 2.7253          |
| (weaker $\pi$ -HB                                            | 1.6235            | 1.6573            | 3.2809          | 2.9211)         |
| HTe-H-* $\pi$ ( $C_s$ : type Ib <sub>Bzn</sub> )             | 1.1763            | 1.6591            | 2.8354          | 2.8206          |
| (HHTe-* $\pi$                                                | 1.9324            | 1.6560            | 3.5884          | 3.5768)         |
| OH <sub>2</sub> -* $\pi$ ( $C_2$ : type II <sub>Bzn</sub> )  | 1.0802            | 2.0777            | 3.1578          | 2.7411          |
| SH <sub>2</sub> -* $\pi$ ( $C_2$ : type II' <sub>Bzn</sub> ) | 1.1359            | 1.7253            | 2.8612          | 2.8102          |
| SeH <sub>2</sub> -* $\pi$ ( $C_2$ : type II <sub>Bzn</sub> ) | 1.1538            | 1.6573            | 2.8111          | 2.7893          |
| TeH <sub>2</sub> -* $\pi$ ( $C_2$ : type II <sub>Bzn</sub> ) | 1.2067            | 1.8438            | 3.0504          | 2.9027          |

<sup>a</sup> See “Methodological Details for Calculations” for BSSs. <sup>b</sup> See text for  $r_{BP-1}$  and  $r_{BP-2}$ , where  $r_{BP} = r_{BP-1} + r_{BP-2}$ .

(To be continued.)



| Species (X---Y)<br>(symmetry: type)                            | $r_{\text{BP-1}}$<br>(Å) | $r_{\text{BP-2}}$<br>(Å) | $r_{\text{BP}}$<br>(Å) | $R_{\text{SL}}$<br>(Å) |
|----------------------------------------------------------------|--------------------------|--------------------------|------------------------|------------------------|
| <b>M06 level</b>                                               |                          |                          |                        |                        |
| HO-H-*- $\pi$ ( $C_s$ : type Ia <sub>Bzn</sub> )               | 1.0101                   | 1.5922                   | 2.6023                 | 2.5729                 |
| (weaker $\pi$ -HB)                                             | 1.2520                   | 1.6598                   | 2.9118                 | 2.7935)                |
| HS-H-*- $\pi$ ( $C_s$ : type Ia <sub>Bzn</sub> )               | 1.0471                   | 1.5936                   | 2.6407                 | 2.6266                 |
| HSe-H-*- $\pi$ ( $C_s$ : type Ia <sub>Bzn</sub> )              | 1.0809                   | 1.6039                   | 2.6848                 | 2.6720                 |
| HTe-H-*- $\pi$ ( $C_s$ : type Ia <sub>Bzn</sub> )              | 1.1460                   | 1.6327                   | 2.7787                 | 2.7672                 |
| (weaker $\pi$ -HB)                                             | 1.4519                   | 1.7942                   | 3.2461                 | 3.1673)                |
| HS-H-*- $\pi$ ( $C_s$ : type Ib <sub>Bzn</sub> )               | 1.1542                   | 1.7012                   | 2.8554                 | 2.8387                 |
| (HHS-*- $\pi$ )                                                | 2.0975                   | 1.7229                   | 3.8204                 | 3.5770)                |
| HSe-H-*- $\pi$ ( $C_s$ : type Ib <sub>Bzn</sub> )              | 1.1721                   | 1.6853                   | 2.8574                 | 2.8422                 |
| (HHS-*- $\pi$ )                                                | 2.0352                   | 1.7156                   | 3.7508                 | 3.5993)                |
| HTe-H-*- $\pi$ ( $C_s$ : type Ib <sub>Bzn</sub> )              | 1.2834                   | 1.7424                   | 3.0258                 | 3.0087                 |
| (HHTe-*- $\pi$ )                                               | 1.9343                   | 1.6888                   | 3.6231                 | 3.6222)                |
| OH <sub>2</sub> -*- $\pi$ ( $C_2$ : type II <sub>Bzn</sub> )   | 1.1472                   | 2.2005                   | 3.3477                 | 2.8835                 |
| SH <sub>2</sub> -*- $\pi$ ( $C_1$ : type II <sub>Bzn</sub> )   | 1.1708                   | 1.8427                   | 3.0136                 | 2.8827                 |
| SeH <sub>2</sub> -*- $\pi$ ( $C_2$ : type II' <sub>Bzn</sub> ) | 1.1767                   | 1.7102                   | 2.8870                 | 2.8525                 |
| TeH <sub>2</sub> -*- $\pi$ ( $C_2$ : type II <sub>Bzn</sub> )  | 1.2551                   | 1.7874                   | 3.0425                 | 2.9784                 |

<sup>a</sup> See “Methodological Details for Calculations” for BSSs. <sup>b</sup> See text for  $r_{\text{BP-1}}$  and  $r_{\text{BP-2}}$ , where  $r_{\text{BP}} = r_{\text{BP-1}} + r_{\text{BP-2}}$ .

## Optimized structures given by Cartesian coordinates

Structures were optimized employing the Gaussian 09 program.<sup>S7</sup> Several types of basis set systems (BSSs: BSS-A, BSS-B, BSS-C, BSS-D, BSS-E and BSS-F) were examined for the evaluation. Table S4 summarizes the BSSs. The basis set for I of the 6-311G\* type<sup>S8</sup> was obtained from EMSL Basis Set Exchange Library.<sup>S9,S10</sup> Higher basis set for I of the (7433211/743111/7411/2 + 1s1p1d1f) type was from Sapporo Basis Set Factory.<sup>S11</sup> The diffusion functions of the *sp* parts for I in (7433211/743111/7411/2 + 1s1p1d1f)<sup>S12</sup> were diverted as those of the *sp* type for the 6-311G\* basis set of I, since the diffusion functions could not be found for 6-311G\* of I. The Møller-Plesset second order energy correlation (MP2) level is applied to the calculations.<sup>S13</sup> The optimized structures were confirmed by the frequency analysis. The abbreviated notation of MP2/BSS-X (X = A, B, C, D, E and F) will also be used to describe the calculation methods employing BSS-X at the MP2 level, if suitable.

**Table S5** Basis set systems employed for the calculations

| Method | C, H           | F, Cl, Br    | I                                                  |
|--------|----------------|--------------|----------------------------------------------------|
| BSS-A  | 6-311G(d, p)   | 6-311G(d)    | (5211111111/411111111/31111) <sup>a</sup>          |
| BSS-B  | 6-311G(d, p)   | 6-311+G(d)   | (5211111111/411111111/31111 + 1s1p) <sup>a,b</sup> |
| BSS-C  | 6-311G(d, p)   | 6-311G(3d)   | (7433211/743111/7411/2 + 1s1p1d1f) <sup>c</sup>    |
| BSS-D  | 6-311G(d, p)   | 6-311G(3df)  | (7433211/743111/7411/2 + 1s1p1d1f) <sup>c</sup>    |
| BSS-E  | 6-311G(d, p)   | 6-311+G(3df) | (7433211/743111/7411/2 + 1s1p1d1f) <sup>c</sup>    |
| BSS-F  | 6-311++G(d, p) | 6-311+G(3df) | (7433211/743111/7411/2 + 1s1p1d1f) <sup>c</sup>    |

<sup>a</sup>The basis set of the 6-311G\* type for I was obtained through EMSL Basis Set Exchange Library.<sup>S3,S4</sup> <sup>b</sup> Diffusion functions of the 1s1p parts in (7433211/743111/7411/2 + 1s1p1d1f)<sup>S5</sup> being employed as the diffusion functions of the 1s1p type for (5211111111/411111111/31111). <sup>c</sup> The higher basis set of the (7433211/743111/7411/2 + 1s1p1d1f) type for I was obtained from Sapporo Basis Set Factory.<sup>S5</sup>

## References

- (S1) (a) *Atoms in Molecules. A Quantum Theory*: R. F. W. Bader, Ed. Oxford University Press, Oxford, UK, **1990**. (b) C. F. Matta and R. J. Boyd, *An Introduction to the Quantum Theory of Atoms in Molecules* in *The Quantum Theory of Atoms in Molecules: From Solid State to DNA and Drug Design*: C. F. Matta and R. J. Boyd, Eds., WILEY-VCH, Weinheim, Germany, **2007**, Chap. 1.
- (S2) (a) R. F. W. Bader, T. S. Slee, D. Cremer and E. Kraka, *J. Am. Chem. Soc.* **1983**, *105*, 5061–5068. (b) R. F. W. Bader, *Chem. Rev.* **1991**, *91*, 893–926. (c) R. F. W. Bader, *J. Phys. Chem. A* **1998**, *102*, 7314–7323. (d) F. Biegler-König, R. F. W. Bader and T. H. Tang, *J. Comput. Chem.* **1982**, *3*, 317–328. (e) R. F. W. Bader, *Acc. Chem. Res.* **1985**, *18*, 9–15. (f) T. H. Tang, R. F. W. Bader and P. MacDougall, *Inorg. Chem.* **1985**, *24*, 2047–2053. (g) F. Biegler-König, J. Schönbohm and D. Bayles, *J. Comput. Chem.* **2001**, *22*, 545–559. (h) F. Biegler-König and J. Schönbohm, *J. Comput. Chem.* **2002**, *23*, 1489–1494.
- (S3) W. Nakanishi, T. Nakamoto, S. Hayashi, T. Sasamori and N. Tokitoh, *Chem. Eur. J.* **2007**, *13*, 255–268.
- (S4) (a) W. Nakanishi, S. Hayashi and K. Narahara, *J. Phys. Chem. A*, **2009**, *113*, 10050–10057. (b) W. Nakanishi, S. Hayashi and K. Narahara, *J. Phys. Chem. A* **2008**, *112*, 13593–13599.
- (S5) W. Nakanishi and S. Hayashi, *Curr. Org. Chem.* **2010**, *14*, 181–197.
- (S6) (a) W. Nakanishi and S. Hayashi, *J. Phys. Chem. A* **2010**, *114*, 7423–7430. (b) W. Nakanishi, S. Hayashi, K. Matsuiwa and M. Kitamoto, *Bull. Chem. Soc. Jpn* **2012**, *85*, 1293–1305.
- (S7) *Gaussian 09 (Revision D.01)*, M. J. Frisch, G. W. Trucks, H. B. Schlegel, G. E. Scuseria, M. A. Robb, J. R. Cheeseman, G. Scalmani, V. Barone, B. Mennucci, G. A. Petersson, H. Nakatsuji, M. Caricato, X. Li, H. P. Hratchian, A. F. Izmaylov, J. Bloino, G. Zheng, J. L. Sonnenberg, M. Hada, M. Ehara, K. Toyota, R. Fukuda, J. Hasegawa, M. Ishida, T. Nakajima, Y. Honda, O. Kitao, H. Nakai, T. Vreven, J. A. Montgomery, Jr., J. E. Peralta, F. Ogliaro, M. Bearpark, J. J. Heyd, E. Brothers, K. N. Kudin, V. N. Staroverov, R. Kobayashi, J. Normand, K. Raghavachari, A. Rendell, J. C. Burant, S. S. Iyengar, J. Tomasi, M. Cossi, N. Rega, J. M. Millam, M. Klene, J. E. Knox, J. B. Cross, V. Bakken, C. Adamo, J. Jaramillo, R. Gomperts, R. E. Stratmann, O. Yazyev, A. J. Austin, R. Cammi, C. Pomelli, J. W. Ochterski, R. L. Martin, K. Morokuma, V. G. Zakrzewski, G. A. Voth, P. Salvador, J. J. Dannenberg, S. Dapprich, A. D. Daniels, Ö. Farkas, J. B. Foresman, J. V. Ortiz, J. Cioslowski and D. J. Fox, Gaussian, Inc.: Wallingford CT, 2009.
- (S8) For the 6-311G(3d) basis sets, see: (a) R. C. Binning Jr. and L. A. Curtiss, *J. Comput. Chem.*, 1990, **11**, 1206–1216; (b) L. A. Curtiss, M. P. McGrath, J.-P. Blaudeau, N. E. Davis, R. C. Binning Jr. and L. Radom, *J. Chem. Phys.*, 1995, **103**, 6104–6113; (c) M. P. McGrath and L. Radom, *J. Chem. Phys.*, 1991, **94**, 511–516. For the diffuse functions (+ and ++), see: T. Clark, J. Chandrasekhar, G. W. Spitznagel and P. v. R. Schleyer, *J. Comput. Chem.*, 1983, **4**, 294–301.
- (S9) D. Feller, *J. Comp. Chem.*, 1996, **17**, 1571–1586.
- (S10) K. L. Schuchardt, B. T. Didier, T. Elsethagen, L. Sun, V. Gurumoorthi, J. Chase, J. Li and T. L. Windus, *J. Chem. Inf. Model.*, 2007, **47**, 1045–1052.
- (S11) T. Noro, M. Sekiya and T. Koga, *Theoret. Chem. Acc.*, 2012, **131**, 1124.
- (S12) (a) For inner and valence shells: T. Koga, S. Yamamoto, T. Shimazaki and H. Tatewaki, *Theor. Chem. Acc.*, 2002, **108**, 41–45; (b) For valence correlated set: M. Sekiya, T. Noro, Y. Osanai and T. Koga, *Theor. Chem. Acc.*, 2001, **106**, 297–300.
- (S13) C. Møller and M. S. Plesset, *Phys. Rev.*, 1934, **46**, 618–622; J. Gauss, *J. Chem. Phys.*, 1993, **99**, 3629–3643; J. Gauss, *Ber. Bunsen-Ges. Phys. Chem.*, 1995, **99**, 1001–1008.

MP2/BSS-F C, H : 6-311++G(d,p), O : 6-311+G(3df)  
 Adduct H-OH--- $\pi$ (C<sub>6</sub>H<sub>6</sub>)  
 Symmetry C<sub>s</sub>  
 energy E = -307.906387 au  
 Standard orientation

|   |   |           |           |           |
|---|---|-----------|-----------|-----------|
| 6 | 0 | -0.621401 | -1.260462 | 0.700630  |
| 6 | 0 | -0.621401 | -1.260462 | -0.700630 |
| 6 | 0 | -0.621401 | -0.047508 | 1.401382  |
| 6 | 0 | -0.621401 | -0.047508 | -1.401382 |
| 6 | 0 | -0.621751 | 1.166072  | 0.700808  |
| 6 | 0 | -0.621751 | 1.166072  | -0.700808 |
| 1 | 0 | -0.623998 | -2.201468 | 1.244318  |
| 1 | 0 | -0.623998 | -2.201468 | -1.244318 |
| 1 | 0 | -0.618592 | -0.046843 | 2.487893  |
| 1 | 0 | -0.618592 | -0.046843 | -2.487893 |
| 1 | 0 | -0.618596 | 2.107113  | 1.243924  |
| 1 | 0 | -0.618596 | 2.107113  | -1.243924 |
| 1 | 0 | 1.727273  | 0.351651  | 0.000000  |
| 8 | 0 | 2.688595  | 0.286512  | 0.000000  |
| 1 | 0 | 2.860984  | -0.658572 | 0.000000  |

MP2/BSS-F C, H : 6-311++G(d,p), S : 6-311+G(3df)  
 Adduct H-SH--- $\pi$ (C<sub>6</sub>H<sub>6</sub>)  
 Symmetry C<sub>s</sub>  
 energy E = -630.4821464 au  
 Standard orientation

|    |   |           |           |           |
|----|---|-----------|-----------|-----------|
| 6  | 0 | -1.077892 | -1.307124 | 0.700866  |
| 6  | 0 | -1.077892 | -1.307124 | -0.700866 |
| 6  | 0 | -1.079338 | -0.093885 | 1.401277  |
| 6  | 0 | -1.079338 | -0.093885 | -1.401277 |
| 6  | 0 | -1.079338 | 1.118876  | 0.700433  |
| 6  | 0 | -1.079338 | 1.118876  | -0.700433 |
| 1  | 0 | -1.079187 | -2.248405 | 1.244252  |
| 1  | 0 | -1.079187 | -2.248405 | -1.244252 |
| 1  | 0 | -1.075781 | -0.093684 | 2.487898  |
| 1  | 0 | -1.075781 | -0.093684 | -2.487898 |
| 1  | 0 | -1.077930 | 2.059964  | 1.243895  |
| 1  | 0 | -1.077930 | 2.059964  | -1.243895 |
| 1  | 0 | 1.354077  | -0.291363 | 0.000000  |
| 16 | 0 | 2.546051  | 0.317645  | 0.000000  |
| 1  | 0 | 3.213721  | -0.841104 | 0.000000  |

MP2/BSS-F C, H : 6-311++G(d,p), Se : 6-311+G(3df)  
 Adduct H-SeH--- $\pi$ (C<sub>6</sub>H<sub>6</sub>)  
 Symmetry C<sub>s</sub>  
 energy E = -2632.8880725 au  
 Standard orientation

|   |   |           |           |           |
|---|---|-----------|-----------|-----------|
| 6 | 0 | -1.638609 | -1.510133 | 0.700947  |
| 6 | 0 | -1.638609 | -1.510133 | -0.700947 |
| 6 | 0 | -1.643023 | -0.297139 | 1.401288  |
| 6 | 0 | -1.643023 | -0.297139 | -1.401288 |
| 6 | 0 | -1.643023 | 0.915624  | 0.700510  |

|    |   |           |           |           |
|----|---|-----------|-----------|-----------|
| 6  | 0 | -1.643023 | 0.915624  | -0.700510 |
| 1  | 0 | -1.638871 | -2.451523 | 1.244322  |
| 1  | 0 | -1.638871 | -2.451523 | -1.244322 |
| 1  | 0 | -1.640764 | -0.296698 | 2.487937  |
| 1  | 0 | -1.640764 | -0.296698 | -2.487937 |
| 1  | 0 | -1.644472 | 1.856787  | 1.244055  |
| 1  | 0 | -1.644472 | 1.856787  | -1.244055 |
| 1  | 0 | 0.872193  | -0.616713 | 0.000000  |
| 34 | 0 | 1.914692  | 0.402973  | 0.000000  |
| 1  | 0 | 2.972341  | -0.601728 | 0.000000  |

MP2/BSS-F C, H : 6-311++G(d,p), Te : 74331111/74311111/74111/21

Adduct H-TeH--- $\pi$ (C<sub>6</sub>H<sub>6</sub>)

Symmetry C<sub>s</sub>

energy E = -6844.6267373 au

Standard orientation

|    |   |           |           |           |
|----|---|-----------|-----------|-----------|
| 6  | 0 | -1.949153 | -1.792328 | 0.701028  |
| 6  | 0 | -1.949153 | -1.792328 | -0.701028 |
| 6  | 0 | -1.958868 | -0.580251 | 1.401901  |
| 6  | 0 | -1.958868 | -0.580251 | -1.401901 |
| 6  | 0 | -1.958868 | 0.632859  | 0.700923  |
| 6  | 0 | -1.958868 | 0.632859  | -0.700923 |
| 1  | 0 | -1.947306 | -2.733929 | 1.244056  |
| 1  | 0 | -1.947306 | -2.733929 | -1.244056 |
| 1  | 0 | -1.958159 | -0.579470 | 2.488615  |
| 1  | 0 | -1.958159 | -0.579470 | -2.488615 |
| 1  | 0 | -1.961782 | 1.574281  | 1.244336  |
| 1  | 0 | -1.961782 | 1.574281  | -1.244336 |
| 1  | 0 | 0.702992  | -0.954180 | 0.000000  |
| 52 | 0 | 1.508804  | 0.492149  | 0.000000  |
| 1  | 0 | 2.976340  | -0.282677 | 0.000000  |

MP2/BSS-F C, H : 6-311++G(d,p), O : 6-311+G(3df)

Adduct OH<sub>2</sub>--- $\pi$ (C<sub>6</sub>H<sub>6</sub>)

Symmetry C<sub>2</sub>

energy E = -307.9057564 au

Standard orientation

|   |   |           |           |           |
|---|---|-----------|-----------|-----------|
| 6 | 0 | -1.212893 | 0.700779  | -0.614927 |
| 6 | 0 | -1.212893 | -0.700777 | -0.614927 |
| 6 | 0 | 0.000000  | 1.401519  | -0.614481 |
| 6 | 0 | 0.000000  | -1.401519 | -0.614481 |
| 6 | 0 | 1.212893  | 0.700777  | -0.614927 |
| 6 | 0 | 1.212893  | -0.700779 | -0.614927 |
| 1 | 0 | -2.154038 | 1.244433  | -0.621935 |
| 1 | 0 | -2.154039 | -1.244431 | -0.621944 |
| 1 | 0 | 0.000000  | 2.488040  | -0.614444 |
| 1 | 0 | 0.000000  | -2.488040 | -0.614444 |
| 1 | 0 | 2.154039  | 1.244431  | -0.621944 |
| 1 | 0 | 2.154038  | -1.244433 | -0.621935 |
| 1 | 0 | 0.752922  | 0.000348  | 2.105478  |
| 8 | 0 | 0.000000  | 0.000000  | 2.704714  |
| 1 | 0 | -0.752922 | -0.000348 | 2.105478  |

MP2/BSS-F C, H : 6-311++G(d,p), S : 6-311+G(3df)  
 Adduct SH<sub>2</sub>---π(C<sub>6</sub>H<sub>6</sub>)  
 Symmetry C<sub>2</sub>  
 energy E = -630.4815717 au  
 Standard orientation

|    |   |           |           |           |
|----|---|-----------|-----------|-----------|
| 6  | 0 | -1.212661 | 0.700648  | -1.086660 |
| 6  | 0 | -1.212661 | -0.700646 | -1.086659 |
| 6  | 0 | 0.000000  | 1.401330  | -1.086567 |
| 6  | 0 | 0.000000  | -1.401330 | -1.086567 |
| 6  | 0 | 1.212661  | 0.700646  | -1.086659 |
| 6  | 0 | 1.212661  | -0.700648 | -1.086660 |
| 1  | 0 | -2.153934 | 1.244330  | -1.091880 |
| 1  | 0 | -2.153935 | -1.244327 | -1.091888 |
| 1  | 0 | 0.000001  | 2.487945  | -1.084576 |
| 1  | 0 | -0.000001 | -2.487945 | -1.084576 |
| 1  | 0 | 2.153935  | 1.244327  | -1.091888 |
| 1  | 0 | 2.153934  | -1.244330 | -1.091880 |
| 1  | 0 | 0.957992  | 0.000472  | 1.705887  |
| 16 | 0 | 0.000000  | 0.000000  | 2.640222  |
| 1  | 0 | -0.957992 | -0.000472 | 1.705887  |

MP2/BSS-F C, H : 6-311++G(d,p), Se : 6-311+G(3df)  
 Adduct SeH<sub>2</sub>---π(C<sub>6</sub>H<sub>6</sub>)  
 Symmetry C<sub>2</sub>  
 energy E = -2632.8871355 au  
 Standard orientation

|    |   |           |           |           |
|----|---|-----------|-----------|-----------|
| 6  | 0 | -1.212611 | 0.700656  | -1.736397 |
| 6  | 0 | -1.212611 | -0.700653 | -1.736396 |
| 6  | 0 | 0.000000  | 1.401334  | -1.736596 |
| 6  | 0 | 0.000000  | -1.401334 | -1.736596 |
| 6  | 0 | 1.212611  | 0.700653  | -1.736396 |
| 6  | 0 | 1.212611  | -0.700656 | -1.736397 |
| 1  | 0 | -2.153909 | 1.244363  | -1.742335 |
| 1  | 0 | -2.153910 | -1.244361 | -1.742343 |
| 1  | 0 | 0.000000  | 2.487982  | -1.735241 |
| 1  | 0 | 0.000000  | -2.487982 | -1.735241 |
| 1  | 0 | 2.153910  | 1.244361  | -1.742343 |
| 1  | 0 | 2.153909  | -1.244363 | -1.742335 |
| 1  | 0 | 1.035002  | 0.000532  | 1.056031  |
| 34 | 0 | 0.000000  | 0.000000  | 2.083542  |
| 1  | 0 | -1.035002 | -0.000532 | 1.056031  |

MP2/BSS-F C, H : 6-311++G(d,p), Te : 74331111/74311111/741111/21  
 Adduct TeH<sub>2</sub>---π(C<sub>6</sub>H<sub>6</sub>)  
 Symmetry C<sub>2</sub>  
 energy E = -6844.6242687 au  
 Standard orientation

|   |   |           |           |           |
|---|---|-----------|-----------|-----------|
| 6 | 0 | -1.212603 | 0.700646  | -2.206398 |
| 6 | 0 | -1.212603 | -0.700644 | -2.206397 |
| 6 | 0 | 0.000000  | 1.401370  | -2.205621 |

|    |   |           |           |           |
|----|---|-----------|-----------|-----------|
| 6  | 0 | 0.000000  | -1.401370 | -2.205621 |
| 6  | 0 | 1.212603  | 0.700644  | -2.206397 |
| 6  | 0 | 1.212603  | -0.700646 | -2.206398 |
| 1  | 0 | -2.153979 | 1.244291  | -2.211354 |
| 1  | 0 | -2.153980 | -1.244288 | -2.211362 |
| 1  | 0 | 0.000001  | 2.488131  | -2.205238 |
| 1  | 0 | -0.000001 | -2.488131 | -2.205238 |
| 1  | 0 | 2.153980  | 1.244288  | -2.211362 |
| 1  | 0 | 2.153979  | -1.244291 | -2.211354 |
| 1  | 0 | 1.174439  | 0.000621  | 0.592519  |
| 52 | 0 | 0.000000  | 0.000000  | 1.759459  |
| 1  | 0 | -1.174439 | -0.000621 | 0.592519  |

MP2/BSS-F C, H : 6-311++G(d,p), S : 6-311+G(3df)

Adduct SH<sub>2</sub>---π(C<sub>6</sub>H<sub>6</sub>)

Symmetry C<sub>2</sub>

energy E = -630.4815543 au

Standard orientation

|    |   |           |           |           |
|----|---|-----------|-----------|-----------|
| 6  | 0 | 0.000000  | 1.400199  | -1.086877 |
| 6  | 0 | -1.213613 | 0.700124  | -1.087463 |
| 6  | 0 | 1.213613  | 0.700121  | -1.087464 |
| 6  | 0 | -1.213613 | -0.700121 | -1.087464 |
| 6  | 0 | 1.213613  | -0.700124 | -1.087463 |
| 6  | 0 | 0.000000  | -1.400199 | -1.086877 |
| 1  | 0 | 0.000000  | 2.487359  | -1.094887 |
| 1  | 0 | -2.154792 | 1.243423  | -1.087782 |
| 1  | 0 | 2.154793  | 1.243419  | -1.087794 |
| 1  | 0 | -2.154793 | -1.243419 | -1.087794 |
| 1  | 0 | 2.154792  | -1.243423 | -1.087782 |
| 1  | 0 | 0.000000  | -2.487359 | -1.094887 |
| 1  | 0 | -0.000692 | -0.957868 | 1.707284  |
| 16 | 0 | 0.000000  | 0.000000  | 2.641750  |
| 1  | 0 | 0.000692  | 0.957868  | 1.707284  |

MP2/BSS-F C, H : 6-311++G(d,p), Te : 74331111/74311111/741111/21

Adduct TeH<sub>2</sub>---π(C<sub>6</sub>H<sub>6</sub>)

Symmetry C<sub>2</sub>

energy E = -6844.6242523 au

Standard orientation

|   |   |           |           |           |
|---|---|-----------|-----------|-----------|
| 6 | 0 | 0.000000  | 1.400098  | -2.208554 |
| 6 | 0 | -1.213630 | 0.700089  | -2.208828 |
| 6 | 0 | 1.213630  | 0.700086  | -2.208830 |
| 6 | 0 | -1.213630 | -0.700086 | -2.208830 |
| 6 | 0 | 1.213630  | -0.700089 | -2.208828 |
| 6 | 0 | 0.000000  | -1.400098 | -2.208554 |
| 1 | 0 | 0.000000  | 2.487299  | -2.216518 |
| 1 | 0 | -2.154873 | 1.243520  | -2.209818 |
| 1 | 0 | 2.154874  | 1.243517  | -2.209828 |
| 1 | 0 | -2.154874 | -1.243517 | -2.209828 |
| 1 | 0 | 2.154873  | -1.243520 | -2.209818 |
| 1 | 0 | 0.000000  | -2.487299 | -2.216518 |
| 1 | 0 | -0.000813 | -1.174227 | 0.594423  |

|    |   |          |          |          |
|----|---|----------|----------|----------|
| 52 | 0 | 0.000000 | 0.000000 | 1.761500 |
| 1  | 0 | 0.000813 | 1.174227 | 0.594423 |

M06-2X/BSS-F C, H : 6-311++G(d,p), O : 6-311+G(3df)

Adduct HO-H--- $\pi$ (C<sub>6</sub>H<sub>6</sub>)

Symmetry C<sub>s</sub>

energy E = -308.6300096 au

Standard orientation

|   |   |           |           |           |
|---|---|-----------|-----------|-----------|
| 6 | 0 | 0.599550  | 1.189072  | 0.696431  |
| 6 | 0 | 0.599550  | 1.189072  | -0.696431 |
| 6 | 0 | 0.595134  | -0.016300 | 1.392857  |
| 6 | 0 | 0.595134  | -0.016300 | -1.392857 |
| 6 | 0 | 0.595134  | -1.222008 | 0.696690  |
| 6 | 0 | 0.595134  | -1.222008 | -0.696690 |
| 1 | 0 | 0.603965  | 2.127185  | 1.239165  |
| 1 | 0 | 0.603965  | 2.127185  | -1.239165 |
| 1 | 0 | 0.590028  | -0.016379 | 2.476145  |
| 1 | 0 | 0.590028  | -0.016379 | -2.476145 |
| 1 | 0 | 0.594293  | -2.160213 | 1.238986  |
| 1 | 0 | 0.594293  | -2.160213 | -1.238986 |
| 1 | 0 | -1.897834 | -0.585697 | 0.000000  |
| 8 | 0 | -2.622224 | 0.047088  | 0.000000  |
| 1 | 0 | -2.178765 | 0.898629  | 0.000000  |

M06-2X/BSS-F C, H : 6-311++G(d,p), S : 6-311+G(3df)

Adduct HS-H--- $\pi$ (C<sub>6</sub>H<sub>6</sub>)

Symmetry C<sub>s</sub>

energy E = -631.5862675 au

Standard orientation

|    |   |           |           |           |
|----|---|-----------|-----------|-----------|
| 6  | 0 | 1.085125  | 1.094316  | 0.696172  |
| 6  | 0 | 1.085125  | 1.094316  | -0.696172 |
| 6  | 0 | 1.082544  | -0.111009 | 1.392474  |
| 6  | 0 | 1.082544  | -0.111009 | -1.392474 |
| 6  | 0 | 1.082544  | -1.316591 | 0.696459  |
| 6  | 0 | 1.082544  | -1.316591 | -0.696459 |
| 1  | 0 | 1.085433  | 2.032329  | 1.239083  |
| 1  | 0 | 1.085433  | 2.032329  | -1.239083 |
| 1  | 0 | 1.076266  | -0.110906 | 2.475852  |
| 1  | 0 | 1.076266  | -0.110906 | -2.475852 |
| 1  | 0 | 1.080077  | -2.254823 | 1.238683  |
| 1  | 0 | 1.080077  | -2.254823 | -1.238683 |
| 1  | 0 | -1.444223 | -0.404810 | 0.000000  |
| 16 | 0 | -2.625401 | 0.227731  | 0.000000  |
| 1  | 0 | -2.035477 | 1.427314  | 0.000000  |

M06-2X/BSS-F C, H : 6-311++G(d,p), Se : 6-311+G(3df)

Adduct HSe-H--- $\pi$ (C<sub>6</sub>H<sub>6</sub>)

Symmetry C<sub>1</sub>

energy E = -2634.9469181 au

Standard orientation

|   |   |           |          |           |
|---|---|-----------|----------|-----------|
| 6 | 0 | -1.595104 | 1.239032 | -0.696138 |
|---|---|-----------|----------|-----------|



|    |   |           |           |           |
|----|---|-----------|-----------|-----------|
| 6  | 0 | -1.595104 | 1.239032  | 0.696139  |
| 6  | 0 | -1.754742 | 0.044591  | -1.392815 |
| 6  | 0 | -1.754740 | 0.044591  | 1.392817  |
| 6  | 0 | -1.915921 | -1.149937 | -0.696456 |
| 6  | 0 | -1.915920 | -1.149937 | 0.696459  |
| 1  | 0 | -1.467949 | 2.169002  | -1.237951 |
| 1  | 0 | -1.467948 | 2.169002  | 1.237952  |
| 1  | 0 | -1.748571 | 0.043904  | -2.476188 |
| 1  | 0 | -1.748569 | 0.043905  | 2.476190  |
| 1  | 0 | -2.039008 | -2.080695 | -1.237638 |
| 1  | 0 | -2.039007 | -2.080694 | 1.237641  |
| 1  | 0 | 0.708899  | -0.550459 | -0.000001 |
| 34 | 0 | 2.098260  | -0.077536 | -0.000001 |
| 1  | 0 | 1.650505  | 1.318044  | 0.000000  |

M06-2X/BSS-F C, H : 6-311++G(d,p), Te : 74331111/7431111/74111/21

Adduct HTe-H--- $\pi$ (C<sub>6</sub>H<sub>6</sub>)

Symmetry C<sub>s</sub>

energy E = -6848.0344995 au

Standard orientation

|    |   |           |           |           |
|----|---|-----------|-----------|-----------|
| 6  | 0 | 2.209469  | 0.818810  | 0.696120  |
| 6  | 0 | 2.209469  | 0.818810  | -0.696120 |
| 6  | 0 | 2.207380  | -0.386273 | 1.392263  |
| 6  | 0 | 2.207380  | -0.386273 | -1.392263 |
| 6  | 0 | 2.207380  | -1.591794 | 0.696293  |
| 6  | 0 | 2.207380  | -1.591794 | -0.696293 |
| 1  | 0 | 2.206821  | 1.756951  | 1.238913  |
| 1  | 0 | 2.206821  | 1.756951  | -1.238913 |
| 1  | 0 | 2.201602  | -0.386005 | 2.475742  |
| 1  | 0 | 2.201602  | -0.386005 | -2.475742 |
| 1  | 0 | 2.205514  | -2.530072 | 1.238552  |
| 1  | 0 | 2.205514  | -2.530072 | -1.238552 |
| 1  | 0 | -0.405711 | -0.681518 | 0.000000  |
| 52 | 0 | -1.759376 | 0.293029  | 0.000000  |
| 1  | 0 | -0.825322 | 1.673343  | 0.000000  |

M06-2X/BSS-F C, H : 6-311++G(d,p), S : 6-311+G(3df)

Adduct HS-H--- $\pi$ (C<sub>6</sub>H<sub>6</sub>)

Symmetry C<sub>s</sub>

energy E = -631.5861935 au

Standard orientation

|   |   |           |           |           |
|---|---|-----------|-----------|-----------|
| 6 | 0 | -1.031191 | -1.421533 | 0.696706  |
| 6 | 0 | -1.031191 | -1.421533 | -0.696706 |
| 6 | 0 | -1.033012 | -0.216116 | 1.392393  |
| 6 | 0 | -1.033012 | -0.216116 | -1.392393 |
| 6 | 0 | -1.033012 | 0.989319  | 0.696011  |
| 6 | 0 | -1.033012 | 0.989319  | -0.696011 |
| 1 | 0 | -1.029477 | -2.359919 | 1.238805  |
| 1 | 0 | -1.029477 | -2.359919 | -1.238805 |
| 1 | 0 | -1.026311 | -0.215430 | 2.475790  |
| 1 | 0 | -1.026311 | -0.215430 | -2.475790 |
| 1 | 0 | -1.024906 | 1.927396  | 1.238249  |

|    |   |           |           |           |
|----|---|-----------|-----------|-----------|
| 1  | 0 | -1.024906 | 1.927396  | -1.238249 |
| 1  | 0 | 1.511961  | -0.397350 | 0.000000  |
| 16 | 0 | 2.398169  | 0.606293  | 0.000000  |
| 1  | 0 | 3.445304  | -0.227479 | 0.000000  |

M06-2X/BSS-F C, H : 6-311++G(d,p), Se : 6-311+G(3df)

Adduct HSe-H--- $\pi$ (C<sub>6</sub>H<sub>6</sub>)

Symmetry C<sub>s</sub>

energy E = -2634.9472993 au

Standard orientation

|    |   |           |           |           |
|----|---|-----------|-----------|-----------|
| 6  | 0 | -1.636400 | -1.570657 | 0.696715  |
| 6  | 0 | -1.636400 | -1.570657 | -0.696715 |
| 6  | 0 | -1.638099 | -0.365419 | 1.392489  |
| 6  | 0 | -1.638099 | -0.365419 | -1.392489 |
| 6  | 0 | -1.638099 | 0.840097  | 0.696107  |
| 6  | 0 | -1.638099 | 0.840097  | -0.696107 |
| 1  | 0 | -1.633504 | -2.509068 | 1.238753  |
| 1  | 0 | -1.633504 | -2.509068 | -1.238753 |
| 1  | 0 | -1.631462 | -0.364829 | 2.475873  |
| 1  | 0 | -1.631462 | -0.364829 | -2.475873 |
| 1  | 0 | -1.632635 | 1.778179  | 1.238525  |
| 1  | 0 | -1.632635 | 1.778179  | -1.238525 |
| 1  | 0 | 0.907419  | -0.592741 | 0.000000  |
| 34 | 0 | 1.906643  | 0.482851  | 0.000000  |
| 1  | 0 | 3.013095  | -0.481019 | 0.000000  |

M06-2X/BSS-F C, H : 6-311++G(d,p), Te : 74331111/74311111/74111/21

Adduct HTe-H--- $\pi$ (C<sub>6</sub>H<sub>6</sub>)

Symmetry C<sub>s</sub>

energy E = -6848.0360172 au

Standard orientation

|    |   |           |           |           |
|----|---|-----------|-----------|-----------|
| 6  | 0 | -2.016651 | -1.796609 | 0.696648  |
| 6  | 0 | -2.016651 | -1.796609 | -0.696648 |
| 6  | 0 | -2.016651 | -0.591960 | 1.392556  |
| 6  | 0 | -2.016651 | -0.591960 | -1.392556 |
| 6  | 0 | -2.016818 | 0.613916  | 0.696323  |
| 6  | 0 | -2.016818 | 0.613916  | -0.696323 |
| 1  | 0 | -2.014350 | -2.735074 | 1.238561  |
| 1  | 0 | -2.014350 | -2.735074 | -1.238561 |
| 1  | 0 | -2.009646 | -0.591185 | 2.475979  |
| 1  | 0 | -2.009646 | -0.591185 | -2.475979 |
| 1  | 0 | -2.013014 | 1.552097  | 1.239017  |
| 1  | 0 | -2.013014 | 1.552097  | -1.239017 |
| 1  | 0 | 0.658001  | -0.901076 | 0.000000  |
| 52 | 0 | 1.558184  | 0.501869  | 0.000000  |
| 1  | 0 | 2.991892  | -0.351962 | 0.000000  |

M06-2X/BSS-F C, H : 6-311++G(d,p), O : 6-311+G(3df)

Adduct OH<sub>2</sub>--- $\pi$ (C<sub>6</sub>H<sub>6</sub>)

Symmetry C<sub>2</sub>

energy E = -308.6300305 au

## Standard orientation

|   |   |           |           |           |
|---|---|-----------|-----------|-----------|
| 6 | 0 | 0.000000  | 1.392038  | -0.595766 |
| 6 | 0 | -1.206204 | 0.695190  | -0.596495 |
| 6 | 0 | 1.206264  | 0.697128  | -0.594198 |
| 6 | 0 | -1.206264 | -0.697128 | -0.594198 |
| 6 | 0 | 1.206204  | -0.695190 | -0.596495 |
| 6 | 0 | 0.000000  | -1.392038 | -0.595766 |
| 1 | 0 | -0.000177 | 2.475734  | -0.597457 |
| 1 | 0 | -2.144877 | 1.236922  | -0.599524 |
| 1 | 0 | 2.144033  | 1.239535  | -0.589828 |
| 1 | 0 | -2.144033 | -1.239535 | -0.589828 |
| 1 | 0 | 2.144877  | -1.236922 | -0.599524 |
| 1 | 0 | 0.000177  | -2.475734 | -0.597457 |
| 1 | 0 | 0.407999  | -0.635022 | 2.025145  |
| 8 | 0 | 0.000000  | 0.000000  | 2.620103  |
| 1 | 0 | -0.407999 | 0.635022  | 2.025145  |

M06-2X/BSS-F C, H : 6-311++G(d,p), S : 6-311+G(3df)

Adduct SH<sub>2</sub>---π(C<sub>6</sub>H<sub>6</sub>)Symmetry C<sub>2</sub>

energy E = -631.5860723 au

## Standard orientation

|    |   |           |           |           |
|----|---|-----------|-----------|-----------|
| 6  | 0 | -1.205350 | 0.695585  | -1.082284 |
| 6  | 0 | -1.205480 | -0.696998 | -1.080160 |
| 6  | 0 | 0.000000  | 1.392405  | -1.078795 |
| 6  | 0 | 0.000000  | -1.392405 | -1.078795 |
| 6  | 0 | 1.205480  | 0.696998  | -1.080160 |
| 6  | 0 | 1.205350  | -0.695585 | -1.082284 |
| 1  | 0 | -2.143949 | 1.237827  | -1.085766 |
| 1  | 0 | -2.143446 | -1.239632 | -1.077827 |
| 1  | 0 | -0.000186 | 2.475861  | -1.073747 |
| 1  | 0 | 0.000186  | -2.475861 | -1.073747 |
| 1  | 0 | 2.143446  | 1.239632  | -1.077827 |
| 1  | 0 | 2.143949  | -1.237827 | -1.085766 |
| 1  | 0 | 0.883868  | -0.370972 | 1.690514  |
| 16 | 0 | 0.000000  | 0.000000  | 2.624282  |
| 1  | 0 | -0.883868 | 0.370972  | 1.690514  |

M06-2X/BSS-F C, H : 6-311++G(d,p), Se : 6-311+G(3df)

Adduct SeH<sub>2</sub>---π(C<sub>6</sub>H<sub>6</sub>)Symmetry C<sub>2</sub>

energy E = -2634.9466306 au

## Standard orientation

|   |   |           |           |           |
|---|---|-----------|-----------|-----------|
| 6 | 0 | -1.205203 | 0.696334  | -1.736479 |
| 6 | 0 | -1.205203 | -0.696334 | -1.736480 |
| 6 | 0 | 0.000000  | 1.392502  | -1.732770 |
| 6 | 0 | 0.000000  | -1.392502 | -1.732770 |
| 6 | 0 | 1.205203  | 0.696334  | -1.736480 |

|    |   |           |           |           |
|----|---|-----------|-----------|-----------|
| 6  | 0 | 1.205203  | -0.696334 | -1.736479 |
| 1  | 0 | -2.143456 | 1.238940  | -1.737171 |
| 1  | 0 | -2.143457 | -1.238940 | -1.737169 |
| 1  | 0 | 0.000000  | 2.475887  | -1.725929 |
| 1  | 0 | 0.000000  | -2.475887 | -1.725929 |
| 1  | 0 | 2.143457  | 1.238940  | -1.737169 |
| 1  | 0 | 2.143456  | -1.238940 | -1.737171 |
| 1  | 0 | 1.042454  | 0.000058  | 1.048037  |
| 34 | 0 | 0.000000  | 0.000000  | 2.081565  |
| 1  | 0 | -1.042454 | -0.000058 | 1.048037  |

M06-2X/BSS-F C, H : 6-311++G(d,p), Te : 74331111/74311111/74111/21

Adduct TeH<sub>2</sub>---π(C<sub>6</sub>H<sub>6</sub>)

Symmetry C<sub>2</sub>

energy E = -6848.0339018 au

Standard orientation

|    |   |           |           |           |
|----|---|-----------|-----------|-----------|
| 6  | 0 | 1.205217  | -0.696509 | -2.241838 |
| 6  | 0 | 1.205113  | 0.695868  | -2.242920 |
| 6  | 0 | 0.000000  | -1.392271 | -2.239033 |
| 6  | 0 | 0.000000  | 1.392271  | -2.239033 |
| 6  | 0 | -1.205113 | -0.695868 | -2.242920 |
| 6  | 0 | -1.205217 | 0.696509  | -2.241838 |
| 1  | 0 | 2.143410  | -1.239055 | -2.239937 |
| 1  | 0 | 2.143530  | 1.238340  | -2.243325 |
| 1  | 0 | -0.000124 | -2.475754 | -2.232518 |
| 1  | 0 | 0.000124  | 2.475754  | -2.232518 |
| 1  | 0 | -2.143530 | -1.238340 | -2.243325 |
| 1  | 0 | -2.143410 | 1.239055  | -2.239937 |
| 1  | 0 | -1.171236 | -0.213568 | 0.619246  |
| 52 | 0 | 0.000000  | 0.000000  | 1.786126  |
| 1  | 0 | 1.171236  | 0.213568  | 0.619246  |

M06/BSS-F C, H : 6-311++G(d,p), O : 6-311+G(3df)

Adduct HO-H---π(C<sub>6</sub>H<sub>6</sub>)

Symmetry C<sub>s</sub>

energy E = -308.6300096 au

Standard orientation

|   |   |           |           |           |
|---|---|-----------|-----------|-----------|
| 6 | 0 | 0.599548  | 1.189067  | 0.696431  |
| 6 | 0 | 0.599548  | 1.189067  | -0.696431 |
| 6 | 0 | 0.595135  | -0.016305 | 1.392858  |
| 6 | 0 | 0.595135  | -0.016305 | -1.392858 |
| 6 | 0 | 0.595135  | -1.222014 | 0.696690  |
| 6 | 0 | 0.595135  | -1.222014 | -0.696690 |
| 1 | 0 | 0.603960  | 2.127182  | 1.239162  |
| 1 | 0 | 0.603960  | 2.127182  | -1.239162 |
| 1 | 0 | 0.590024  | -0.016385 | 2.476145  |
| 1 | 0 | 0.590024  | -0.016385 | -2.476145 |
| 1 | 0 | 0.594289  | -2.160219 | 1.238987  |
| 1 | 0 | 0.594289  | -2.160219 | -1.238987 |
| 1 | 0 | -1.897831 | -0.585674 | 0.000000  |
| 8 | 0 | -2.622221 | 0.047110  | 0.000000  |
| 1 | 0 | -2.178764 | 0.898652  | 0.000000  |

M06/BSS-F C, H : 6-311++G(d,p), S : 6-311+G(3df)  
 Adduct HS-H--- $\pi$ (C<sub>6</sub>H<sub>6</sub>)  
 Symmetry C<sub>s</sub>  
 energy E = -631.5026003 au  
 Standard orientation

|    |   |           |           |           |
|----|---|-----------|-----------|-----------|
| 6  | 0 | -1.122050 | -1.254147 | 0.694663  |
| 6  | 0 | -1.122050 | -1.254147 | -0.694663 |
| 6  | 0 | -1.122050 | -0.052034 | 1.389945  |
| 6  | 0 | -1.122050 | -0.052034 | -1.389945 |
| 6  | 0 | -1.125374 | 1.150765  | 0.694812  |
| 6  | 0 | -1.125374 | 1.150765  | -0.694812 |
| 1  | 0 | -1.121639 | -2.194773 | 1.237421  |
| 1  | 0 | -1.121639 | -2.194773 | -1.237421 |
| 1  | 0 | -1.117247 | -0.051806 | 2.475519  |
| 1  | 0 | -1.117247 | -0.051806 | -2.475519 |
| 1  | 0 | -1.126602 | 2.091429  | 1.237516  |
| 1  | 0 | -1.126602 | 2.091429  | -1.237516 |
| 1  | 0 | 1.448420  | 0.626841  | 0.000000  |
| 16 | 0 | 2.713881  | 0.166135  | 0.000000  |
| 1  | 0 | 2.294154  | -1.109698 | 0.000000  |

M06/BSS-F C, H : 6-311++G(d,p), Se : 6-311+G(3df)  
 Adduct HSe-H--- $\pi$ (C<sub>6</sub>H<sub>6</sub>)  
 Symmetry C<sub>s</sub>  
 energy E = -2634.745301 au  
 Standard orientation

|    |   |           |           |           |
|----|---|-----------|-----------|-----------|
| 6  | 0 | 1.787013  | 1.151866  | 0.694597  |
| 6  | 0 | 1.787013  | 1.151866  | -0.694597 |
| 6  | 0 | 1.784285  | -0.050222 | 1.389909  |
| 6  | 0 | 1.784285  | -0.050222 | -1.389909 |
| 6  | 0 | 1.784285  | -1.252894 | 0.694799  |
| 6  | 0 | 1.784285  | -1.252894 | -0.694799 |
| 1  | 0 | 1.788072  | 2.092494  | 1.237467  |
| 1  | 0 | 1.788072  | 2.092494  | -1.237467 |
| 1  | 0 | 1.779453  | -0.050233 | 2.475499  |
| 1  | 0 | 1.779453  | -0.050233 | -2.475499 |
| 1  | 0 | 1.783352  | -2.193591 | 1.237436  |
| 1  | 0 | 1.783352  | -2.193591 | -1.237436 |
| 1  | 0 | -0.804576 | -0.591614 | 0.000000  |
| 34 | 0 | -2.136108 | 0.039043  | 0.000000  |
| 1  | 0 | -1.536497 | 1.381790  | 0.000000  |

M06/BSS-F C, H : 6-311++G(d,p), Te : 74331111/7431111/74111/21  
 Adduct HTe-H--- $\pi$ (C<sub>6</sub>H<sub>6</sub>)  
 Symmetry C<sub>s</sub>  
 energy E = -6847.3710687 au  
 Standard orientation

|   |   |          |           |           |
|---|---|----------|-----------|-----------|
| 6 | 0 | 2.265057 | 0.992715  | 0.694555  |
| 6 | 0 | 2.265057 | 0.992715  | -0.694555 |
| 6 | 0 | 2.262634 | -0.209371 | 1.389804  |

|    |   |           |           |           |
|----|---|-----------|-----------|-----------|
| 6  | 0 | 2.262634  | -0.209371 | -1.389804 |
| 6  | 0 | 2.262634  | -1.411886 | 0.694729  |
| 6  | 0 | 2.262634  | -1.411886 | -0.694729 |
| 1  | 0 | 2.265277  | 1.933446  | 1.237433  |
| 1  | 0 | 2.265277  | 1.933446  | -1.237433 |
| 1  | 0 | 2.257991  | -0.209193 | 2.475490  |
| 1  | 0 | 2.257991  | -0.209193 | -2.475490 |
| 1  | 0 | 2.261671  | -2.352641 | 1.237347  |
| 1  | 0 | 2.261671  | -2.352641 | -1.237347 |
| 1  | 0 | -0.439745 | -0.816470 | 0.000000  |
| 52 | 0 | -1.803044 | 0.155432  | 0.000000  |
| 1  | 0 | -0.855778 | 1.533268  | 0.000000  |

M06/BSS-F C, H : 6-311++G(d,p), S : 6-311+G(3df)

Adduct HS-H--- $\pi$ (C<sub>6</sub>H<sub>6</sub>)

Symmetry C<sub>s</sub>

energy E = -631.5021622 au

Standard orientation

|    |   |           |           |           |
|----|---|-----------|-----------|-----------|
| 6  | 0 | -1.067909 | -1.399078 | 0.694985  |
| 6  | 0 | -1.067909 | -1.399078 | -0.694985 |
| 6  | 0 | -1.068555 | -0.196503 | 1.389783  |
| 6  | 0 | -1.068555 | -0.196503 | -1.389783 |
| 6  | 0 | -1.068555 | 1.005836  | 0.694440  |
| 6  | 0 | -1.068555 | 1.005836  | -0.694440 |
| 1  | 0 | -1.068740 | -2.339898 | 1.237484  |
| 1  | 0 | -1.068740 | -2.339898 | -1.237484 |
| 1  | 0 | -1.063505 | -0.195954 | 2.475398  |
| 1  | 0 | -1.063505 | -0.195954 | -2.475398 |
| 1  | 0 | -1.062344 | 1.946419  | 1.236982  |
| 1  | 0 | -1.062344 | 1.946419  | -1.236982 |
| 1  | 0 | 1.613601  | -0.467481 | 0.000000  |
| 16 | 0 | 2.480681  | 0.561373  | 0.000000  |
| 1  | 0 | 3.544918  | -0.258677 | 0.000000  |

M06/BSS-F C, H : 6-311++G(d,p), Se : 6-311+G(3df)

Adduct HSe-H--- $\pi$ (C<sub>6</sub>H<sub>6</sub>)

Symmetry C<sub>s</sub>

energy E = -2634.7455592 au

Standard orientation

|   |   |           |           |           |
|---|---|-----------|-----------|-----------|
| 6 | 0 | -1.657976 | -1.586192 | 0.695015  |
| 6 | 0 | -1.657976 | -1.586192 | -0.695015 |
| 6 | 0 | -1.659160 | -0.383971 | 1.389948  |
| 6 | 0 | -1.659160 | -0.383971 | -1.389948 |
| 6 | 0 | -1.659160 | 0.818666  | 0.694583  |
| 6 | 0 | -1.659160 | 0.818666  | -0.694583 |
| 1 | 0 | -1.657080 | -2.527056 | 1.237387  |
| 1 | 0 | -1.657080 | -2.527056 | -1.237387 |
| 1 | 0 | -1.654146 | -0.383396 | 2.475527  |
| 1 | 0 | -1.654146 | -0.383396 | -2.475527 |
| 1 | 0 | -1.655678 | 1.759276  | 1.237310  |
| 1 | 0 | -1.655678 | 1.759276  | -1.237310 |
| 1 | 0 | 1.030167  | -0.663289 | 0.000000  |

|    |   |          |           |          |
|----|---|----------|-----------|----------|
| 34 | 0 | 1.926337 | 0.503963  | 0.000000 |
| 1  | 0 | 3.123727 | -0.351132 | 0.000000 |

M06/BSS-F C, H : 6-311++G(d,p), Te : 74331111/74311111/741111/21

Adduct HTe-H--- $\pi$ (C<sub>6</sub>H<sub>6</sub>)

Symmetry C<sub>s</sub>

energy E = -6847.372391 au

Standard orientation

|    |   |           |           |           |
|----|---|-----------|-----------|-----------|
| 6  | 0 | -2.044980 | -1.849653 | 0.694994  |
| 6  | 0 | -2.044980 | -1.849653 | -0.694994 |
| 6  | 0 | -2.044980 | -0.648095 | 1.390117  |
| 6  | 0 | -2.044980 | -0.648095 | -1.390117 |
| 6  | 0 | -2.045790 | 0.555035  | 0.694854  |
| 6  | 0 | -2.045790 | 0.555035  | -0.694854 |
| 1  | 0 | -2.044655 | -2.790552 | 1.237208  |
| 1  | 0 | -2.044655 | -2.790552 | -1.237208 |
| 1  | 0 | -2.039689 | -0.647279 | 2.475732  |
| 1  | 0 | -2.039689 | -0.647279 | -2.475732 |
| 1  | 0 | -2.043890 | 1.495707  | 1.237829  |
| 1  | 0 | -2.043890 | 1.495707  | -1.237829 |
| 1  | 0 | 0.826245  | -0.950699 | 0.000000  |
| 52 | 0 | 1.576341  | 0.544659  | 0.000000  |
| 1  | 0 | 3.089510  | -0.174752 | 0.000000  |

M06/BSS-F C, H : 6-311++G(d,p), O : 6-311+G(3df)

Adduct OH<sub>2</sub>--- $\pi$ (C<sub>6</sub>H<sub>6</sub>)

Symmetry C<sub>2</sub>

energy E = -308.5396674 au

Standard orientation

|   |   |           |           |           |
|---|---|-----------|-----------|-----------|
| 6 | 0 | 0.000000  | 1.389415  | -0.622771 |
| 6 | 0 | -1.203262 | 0.693591  | -0.623454 |
| 6 | 0 | 1.203446  | 0.695550  | -0.623546 |
| 6 | 0 | -1.203446 | -0.695550 | -0.623546 |
| 6 | 0 | 1.203262  | -0.693591 | -0.623454 |
| 6 | 0 | 0.000000  | -1.389415 | -0.622771 |
| 1 | 0 | -0.000397 | 2.475303  | -0.625879 |
| 1 | 0 | -2.144231 | 1.235853  | -0.627639 |
| 1 | 0 | 2.143628  | 1.238347  | -0.622629 |
| 1 | 0 | -2.143628 | -1.238347 | -0.622629 |
| 1 | 0 | 2.144231  | -1.235853 | -0.627639 |
| 1 | 0 | 0.000397  | -2.475303 | -0.625879 |
| 1 | 0 | 0.398450  | -0.642258 | 2.145003  |
| 8 | 0 | 0.000000  | 0.000000  | 2.737444  |
| 1 | 0 | -0.398450 | 0.642258  | 2.145003  |

M06/BSS-F C, H : 6-311++G(d,p), S : 6-311+G(3df)

Adduct SH<sub>2</sub>--- $\pi$ (C<sub>6</sub>H<sub>6</sub>)

Symmetry C<sub>1</sub>

energy E = -631.5025888 au

Standard orientation

|   |   |           |          |           |
|---|---|-----------|----------|-----------|
| 6 | 0 | -1.098676 | 1.316839 | -0.440444 |
|---|---|-----------|----------|-----------|

|    |   |           |           |           |
|----|---|-----------|-----------|-----------|
| 6  | 0 | -1.098773 | 1.039521  | 0.921317  |
| 6  | 0 | -1.098664 | 0.277295  | -1.361952 |
| 6  | 0 | -1.098614 | -0.277295 | 1.361967  |
| 6  | 0 | -1.098808 | -1.039521 | -0.921303 |
| 6  | 0 | -1.098662 | -1.316839 | 0.440459  |
| 1  | 0 | -1.101141 | 2.346991  | -0.784478 |
| 1  | 0 | -1.098992 | 1.852499  | 1.641275  |
| 1  | 0 | -1.095913 | 0.494468  | -2.425672 |
| 1  | 0 | -1.095822 | -0.494467 | 2.425686  |
| 1  | 0 | -1.099056 | -1.852499 | -1.641261 |
| 1  | 0 | -1.101116 | -2.346991 | 0.784493  |
| 1  | 0 | 1.728034  | -0.962576 | 0.000075  |
| 16 | 0 | 2.668071  | -0.000002 | -0.000007 |
| 1  | 0 | 1.728052  | 0.962590  | -0.000270 |

M06/BSS-F C, H : 6-311++G(d,p), Se : 6-311+G(3df)

Adduct SeH<sub>2</sub>---π(C<sub>6</sub>H<sub>6</sub>)

Symmetry C<sub>2</sub>

energy E = -2634.7453355 au

Standard orientation

|    |   |           |           |           |
|----|---|-----------|-----------|-----------|
| 6  | 0 | 1.202450  | 0.693628  | -1.758169 |
| 6  | 0 | 0.000000  | 1.389725  | -1.757103 |
| 6  | 0 | 1.202698  | -0.695699 | -1.758146 |
| 6  | 0 | -1.202698 | 0.695699  | -1.758146 |
| 6  | 0 | 0.000000  | -1.389725 | -1.757103 |
| 6  | 0 | -1.202450 | -0.693628 | -1.758169 |
| 1  | 0 | 2.143562  | 1.236097  | -1.761631 |
| 1  | 0 | 0.000711  | 2.475440  | -1.754504 |
| 1  | 0 | 2.143105  | -1.238559 | -1.757026 |
| 1  | 0 | -2.143105 | 1.238559  | -1.757026 |
| 1  | 0 | -0.000711 | -2.475440 | -1.754504 |
| 1  | 0 | -2.143562 | -1.236097 | -1.761631 |
| 1  | 0 | -0.907992 | -0.522150 | 1.073920  |
| 34 | 0 | 0.000000  | 0.000000  | 2.108221  |
| 1  | 0 | 0.907992  | 0.522150  | 1.073920  |

M06/BSS-F C, H : 6-311++G(d,p), Te : 74331111/74311111/74111/21

Adduct TeH<sub>2</sub>---π(C<sub>6</sub>H<sub>6</sub>)

Symmetry C<sub>2</sub>

energy E = -6847.3711044 au

Standard orientation

|   |   |           |           |           |
|---|---|-----------|-----------|-----------|
| 6 | 0 | 1.202390  | -0.695238 | -2.301113 |
| 6 | 0 | 1.202256  | 0.694057  | -2.301380 |
| 6 | 0 | 0.000000  | -1.389906 | -2.300876 |
| 6 | 0 | 0.000000  | 1.389906  | -2.300876 |
| 6 | 0 | -1.202256 | -0.694057 | -2.301380 |
| 6 | 0 | -1.202390 | 0.695238  | -2.301113 |
| 1 | 0 | 2.143012  | -1.237999 | -2.300338 |
| 1 | 0 | 2.143325  | 1.236507  | -2.302986 |
| 1 | 0 | -0.000311 | -2.475624 | -2.297618 |
| 1 | 0 | 0.000311  | 2.475624  | -2.297618 |
| 1 | 0 | -2.143325 | -1.236507 | -2.302986 |



|    |   |           |           |           |
|----|---|-----------|-----------|-----------|
| 1  | 0 | -2.143012 | 1.237999  | -2.300338 |
| 1  | 0 | -1.131951 | -0.369073 | 0.658430  |
| 52 | 0 | 0.000000  | 0.000000  | 1.833182  |
| 1  | 0 | 1.131951  | 0.369073  | 0.658430  |
